# Supplementary material for: Thiocarbamoyl in synthesis of the absorbent bis-mono and dimethine cyanine dyes incorporating porphyrin, thiazoles, thiazolones, thiadiazoles, pyrazoles and pyrazolones
Source: Royal Society of Chemistry journal article supplement (doi:10.1039/c7ra10165a), 2017-01-01
Supplement: c7ra10165a1.pdf [file c7ra10165a1.pdf]

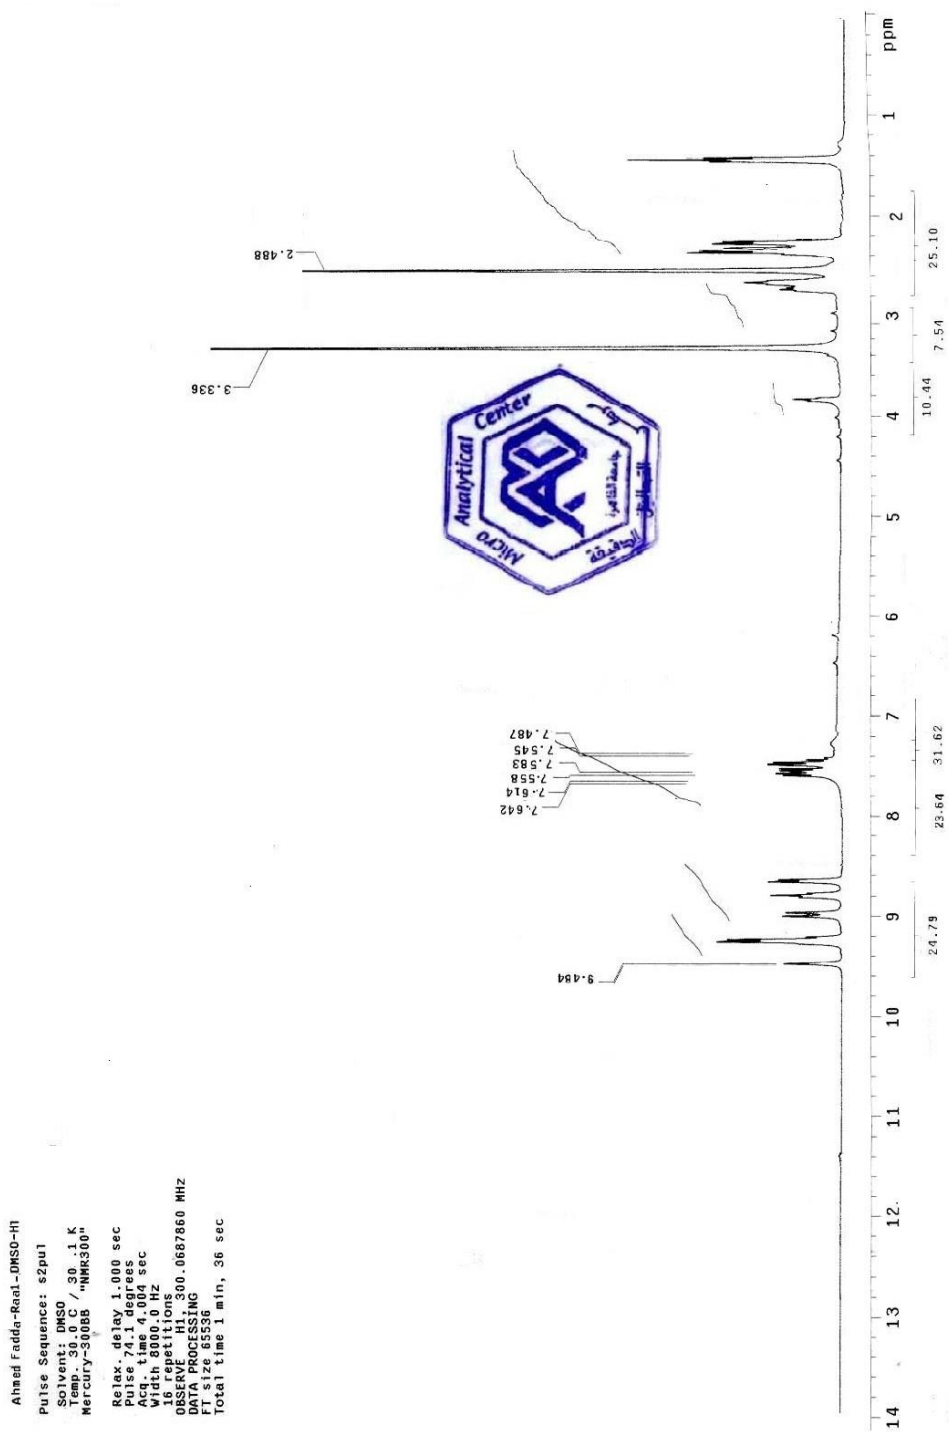

Figure 1:  $^1\text{H-NMR}$  Spectrum of Compound (1)

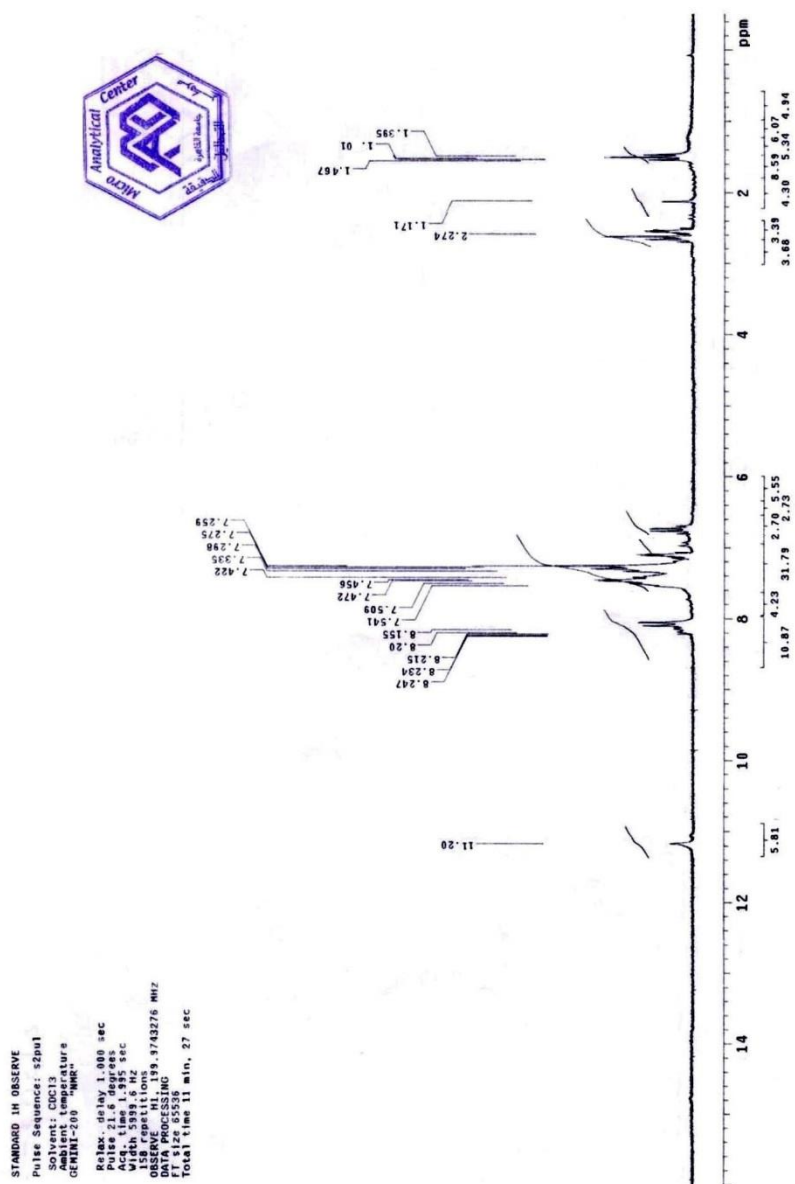

Figure 1: <sup>1</sup>H-NMR Spectrum of Compound (3)

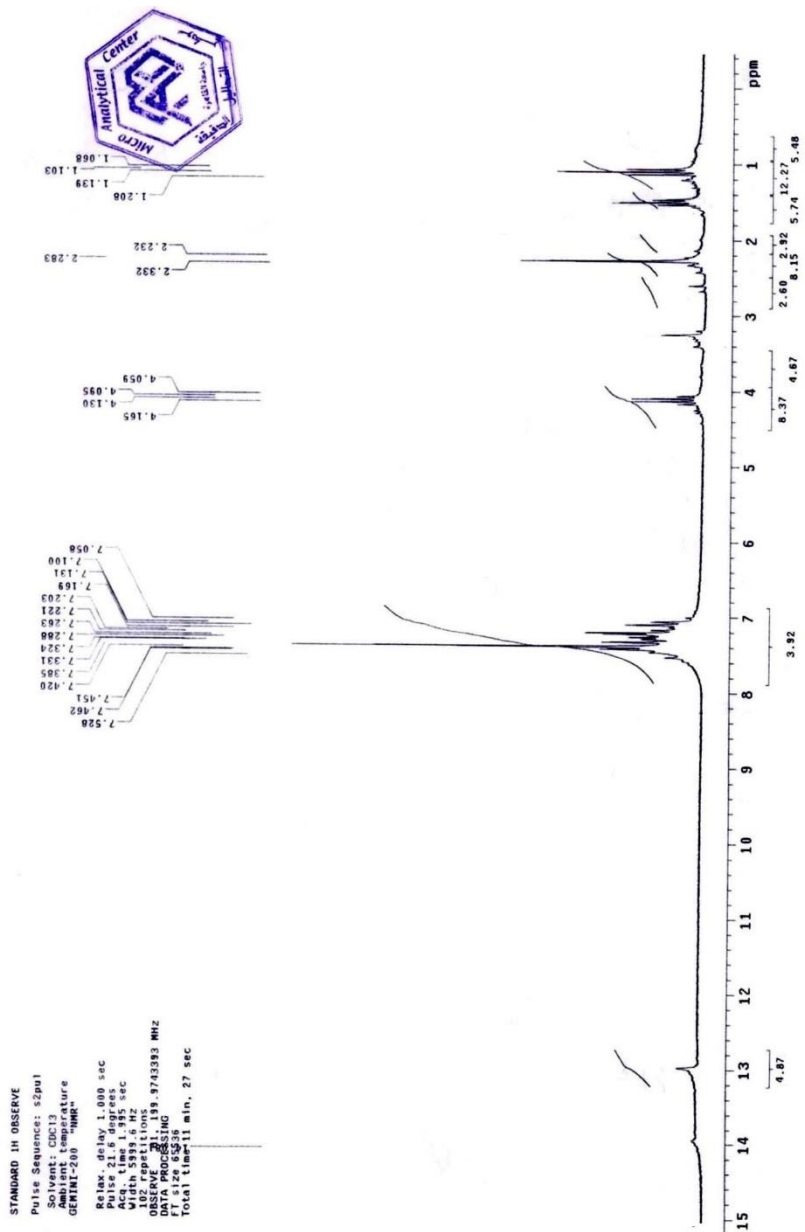

Figure 2: <sup>1</sup>H-NMR Spectrum of Compound (6)

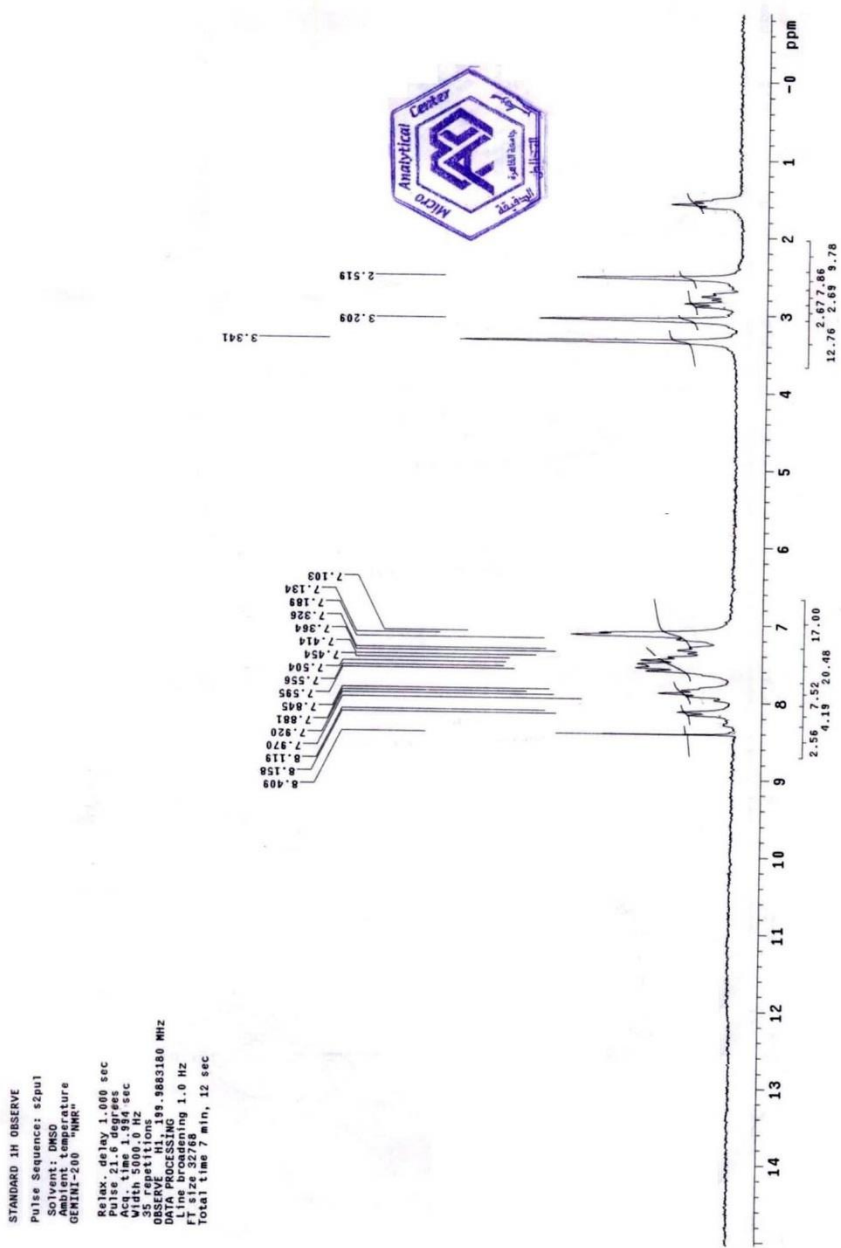

Figure 3: <sup>1</sup>H-NMR Spectrum of Compound (7)

Ahmad Faido -Raa8 - DMSO-H1  
 Pulse Sequence: s2pul  
 Solvent: DMSO  
 Temperature: 300.1 K  
 Mercury-3008 / "NMR300"  
 Relax. delay: 1.000 sec  
 Pulse program: zgpg30  
 Pulse time: 14.000 sec  
 Width: 8000.0 Hz  
 Is: repetitions  
 0.00000000.0687860 MHz  
 DATA PROCESSING  
 FT size: 65536  
 Total time: 1 min, 36 sec

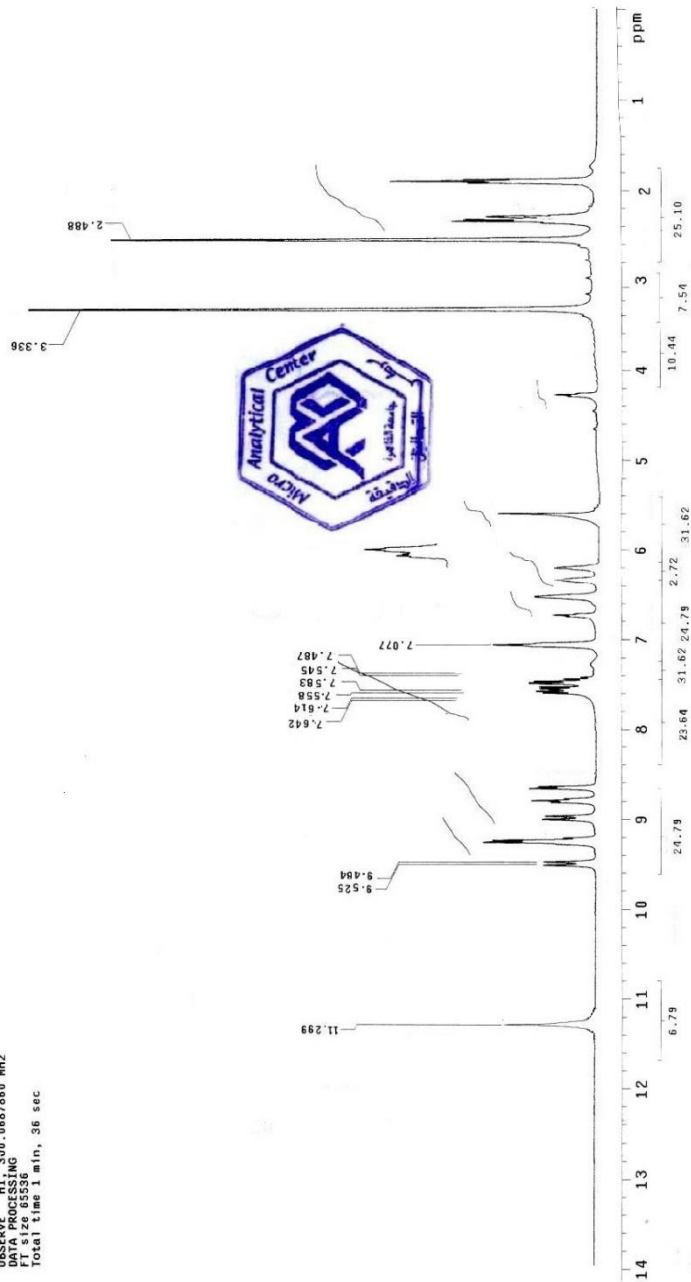

Figure 4: <sup>1</sup>H-NMR Spectrum of Compound (8)

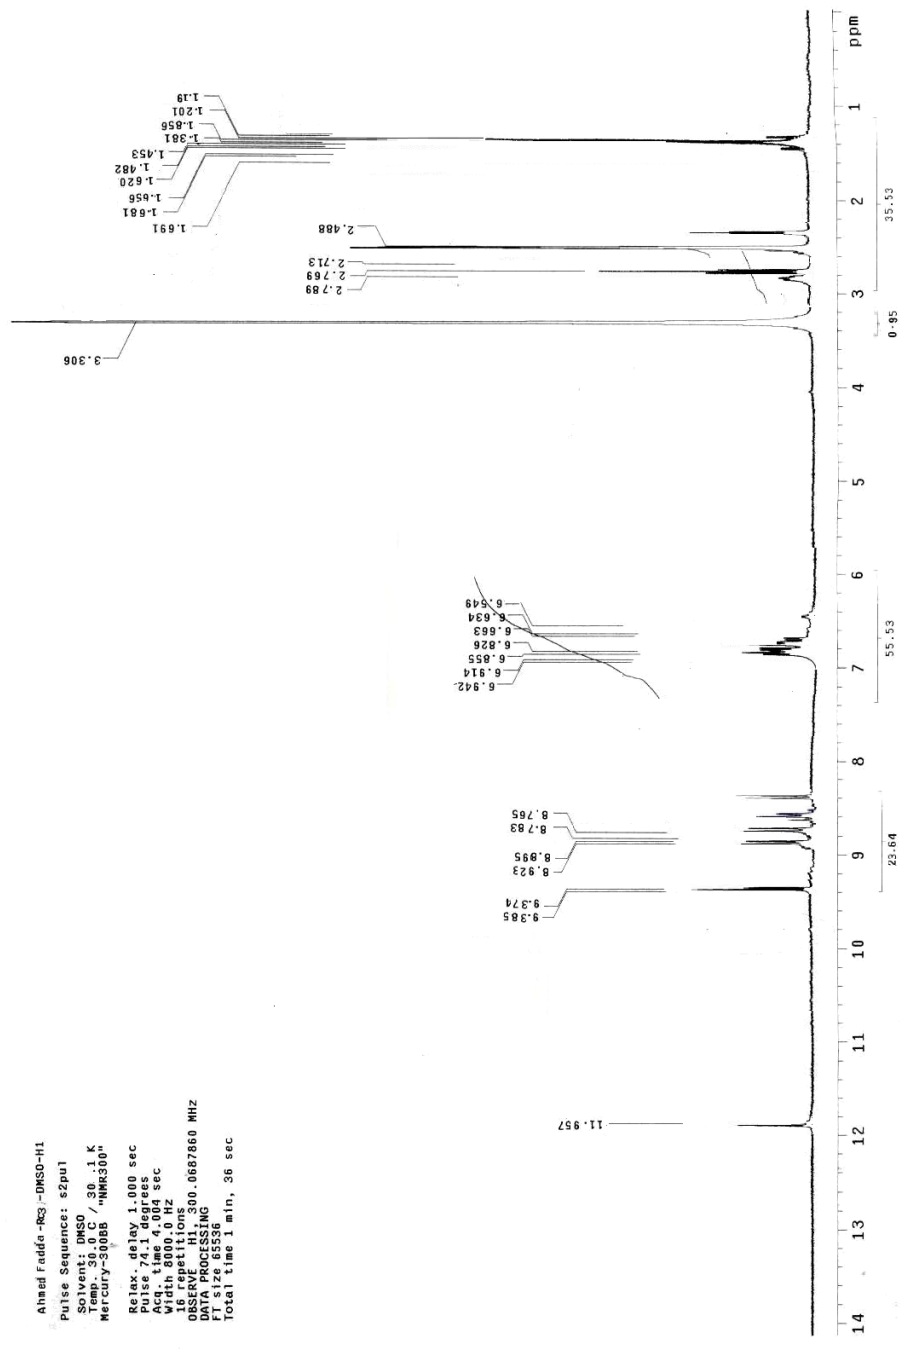

Figure 5:  $^1\text{H-NMR}$  Spectrum of Compound (9)

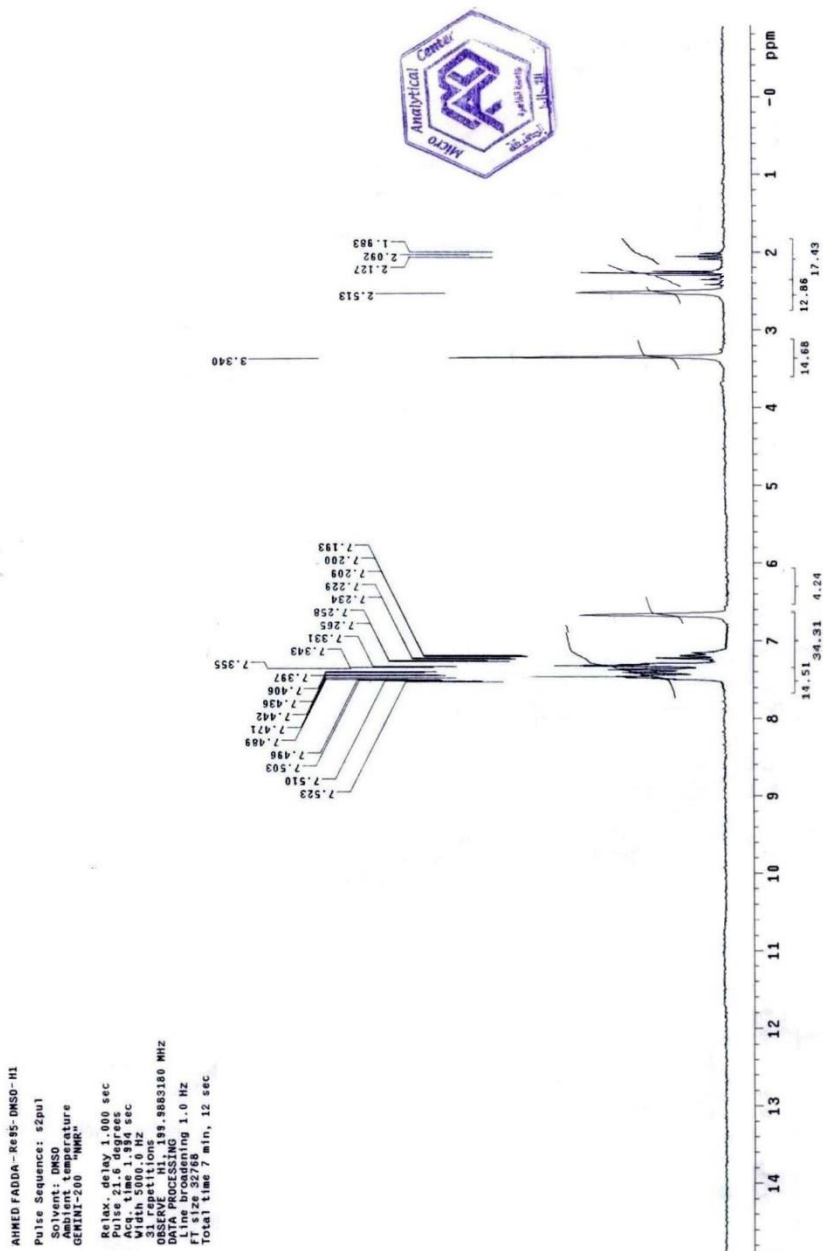

Figure 6: <sup>1</sup>H-NMR Spectrum of Compound (10)

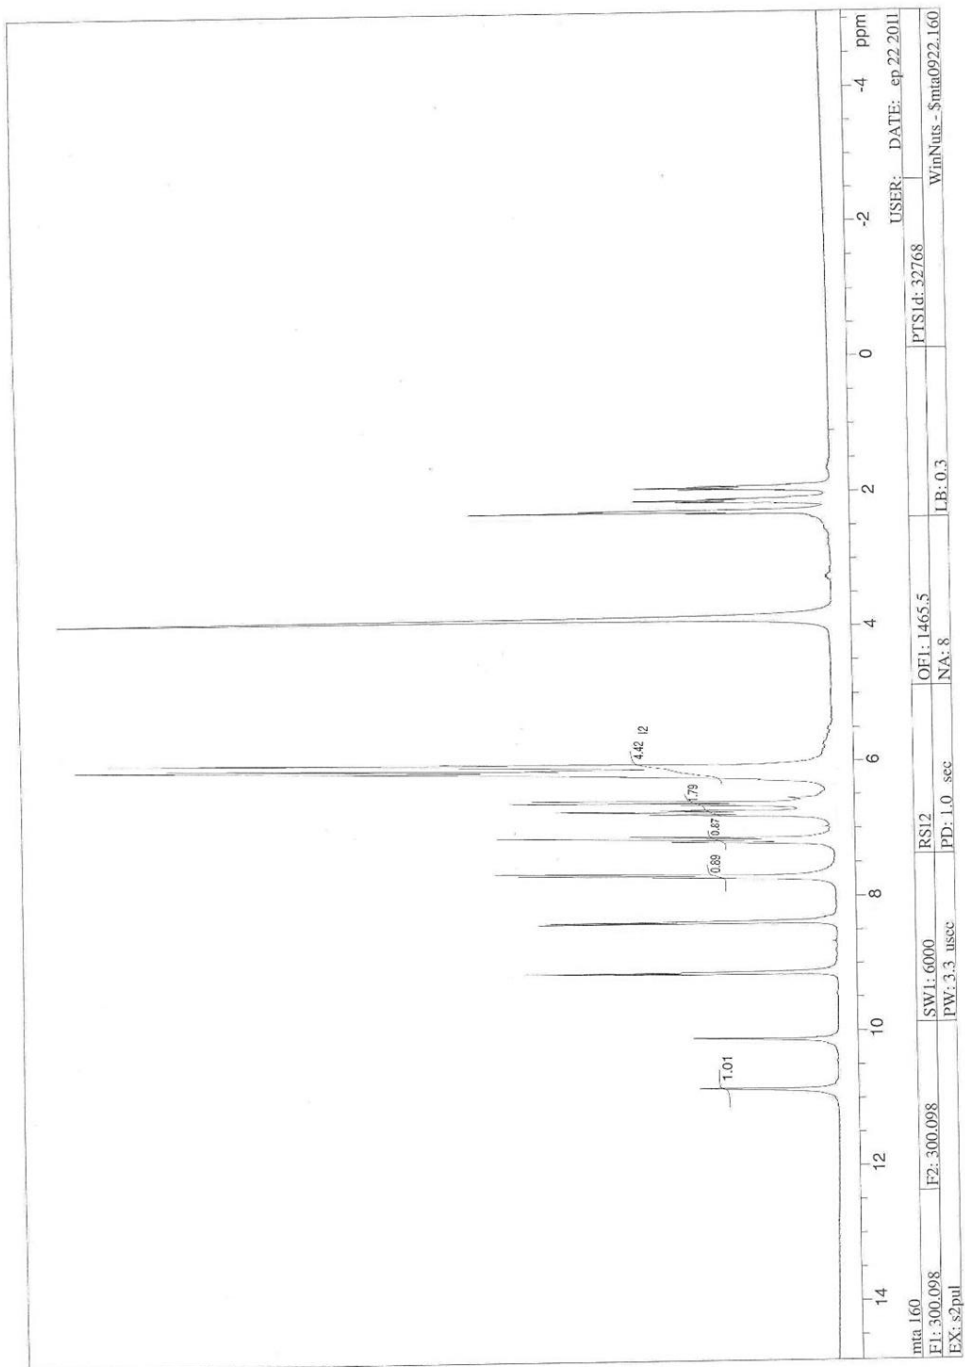

**Figure 7:**  $^1\text{H}$ -NMR Spectrum of Compound (11a)



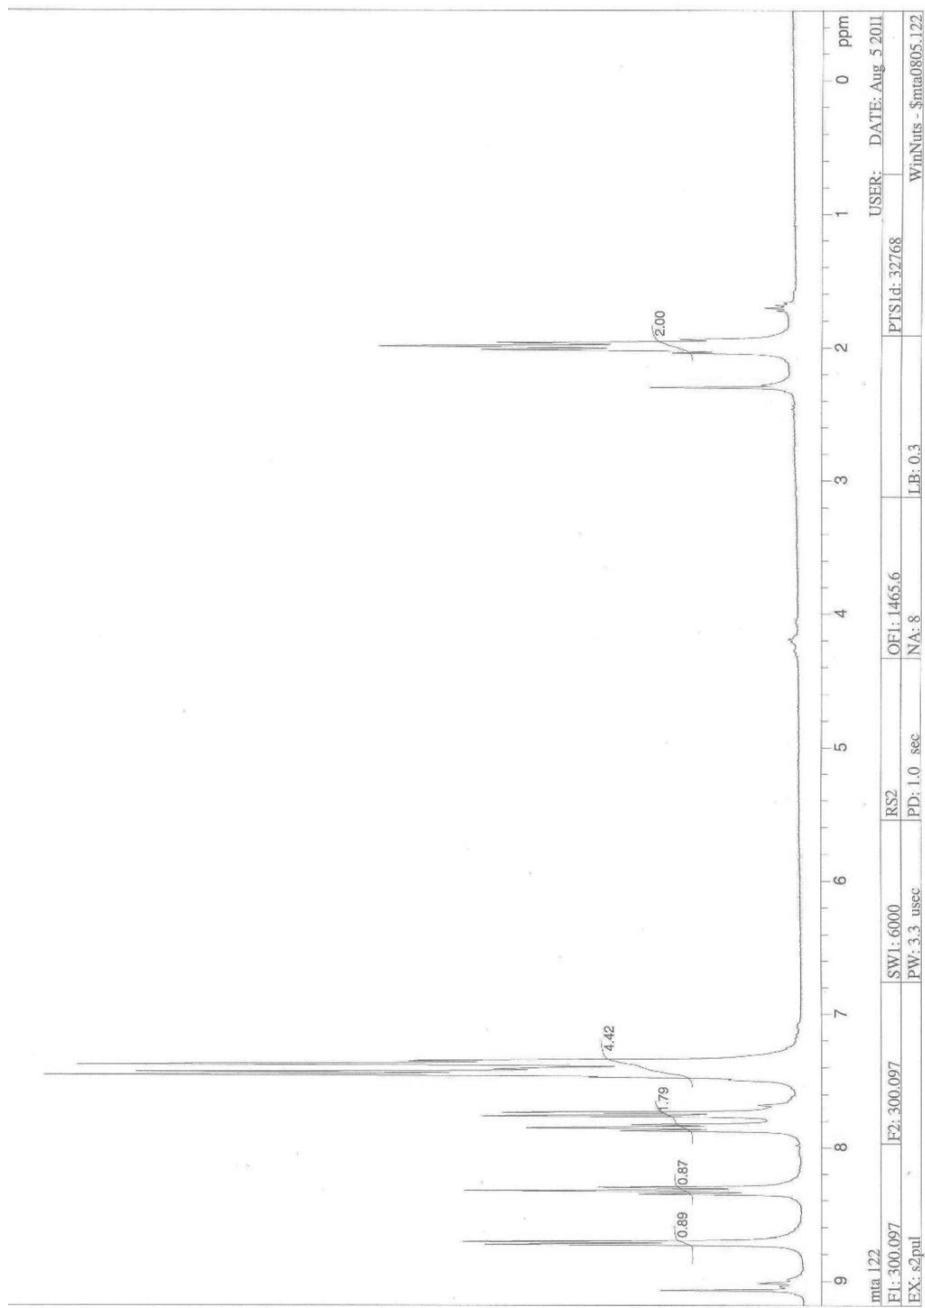

**Figure 8:**  $^1\text{H-NMR}$  Spectrum of Compound (116)

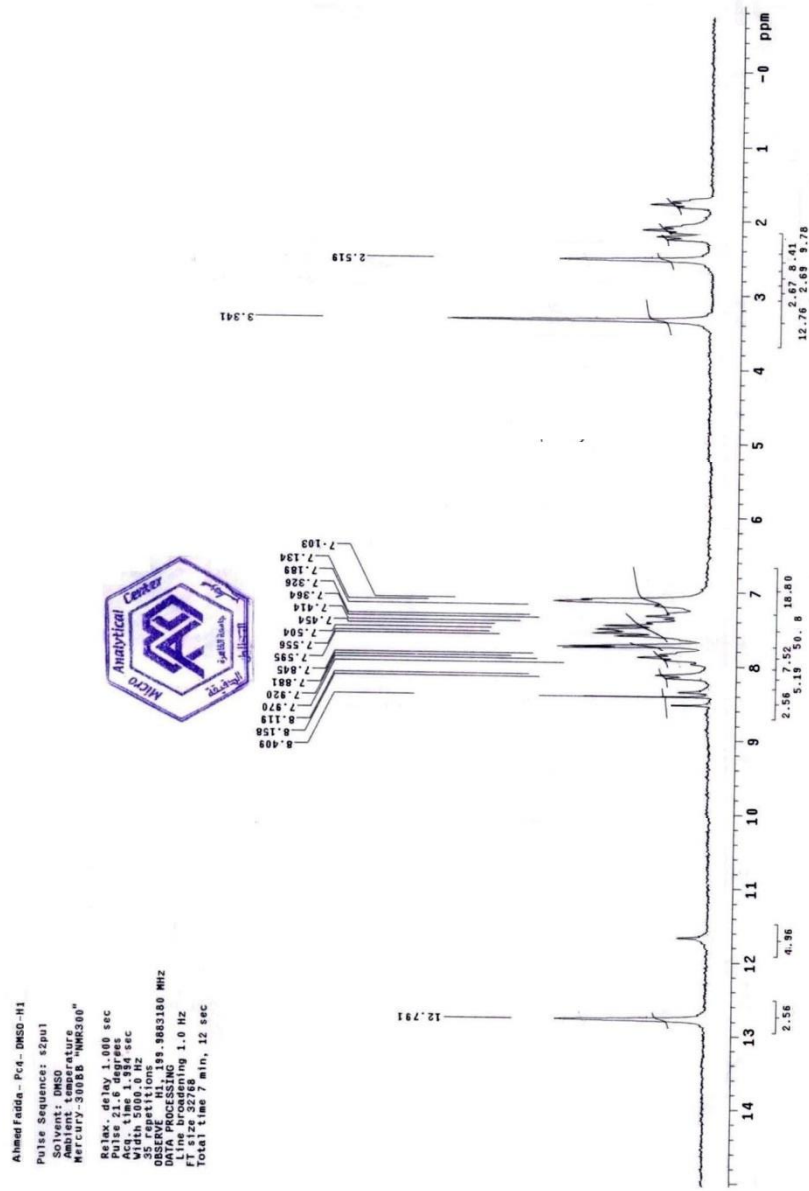

Figure 9:  $^1\text{H-NMR}$  Spectrum of Compound (11c)

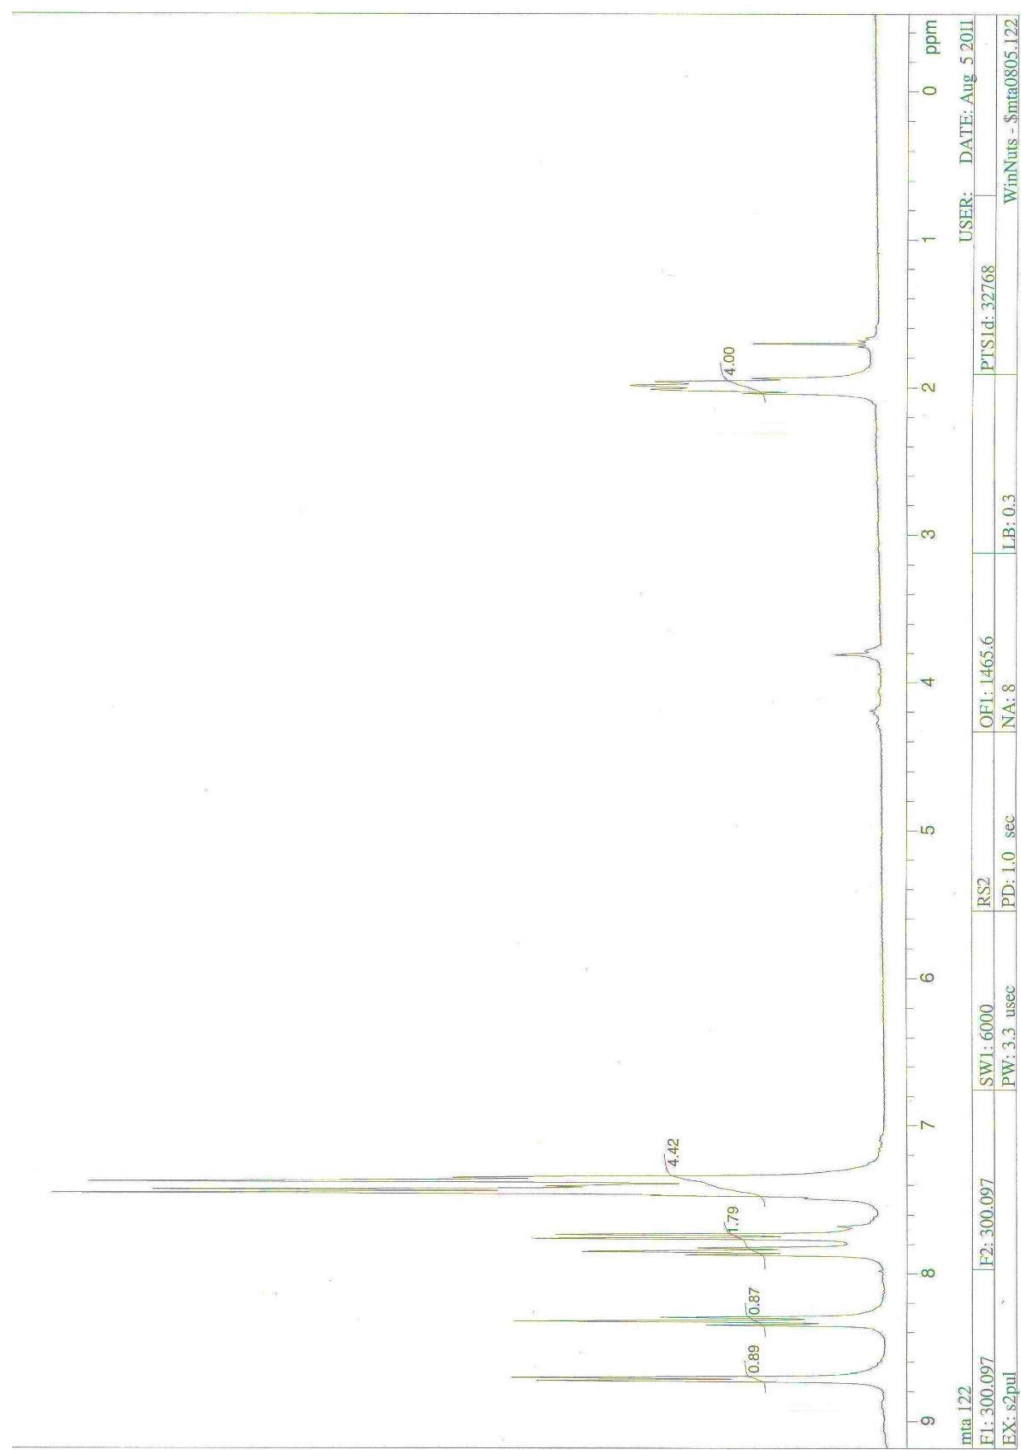

Figure 10:  $^1\text{H}$ -NMR Spectrum of Compound (12a)

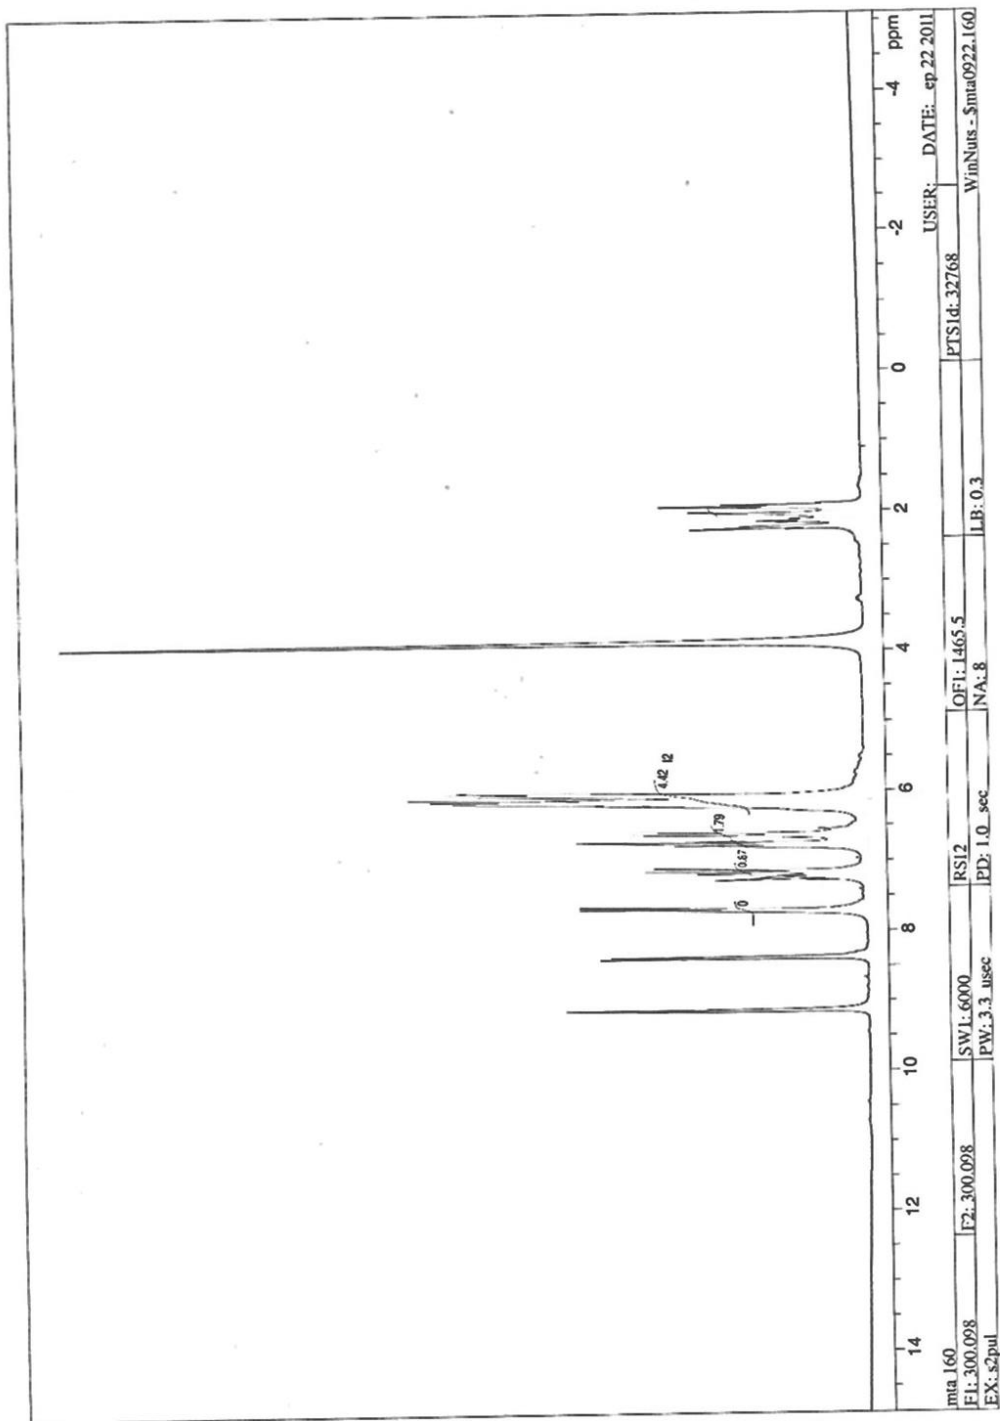

Figure 11:  $^1\text{H}$ -NMR Spectrum of Compound (126)

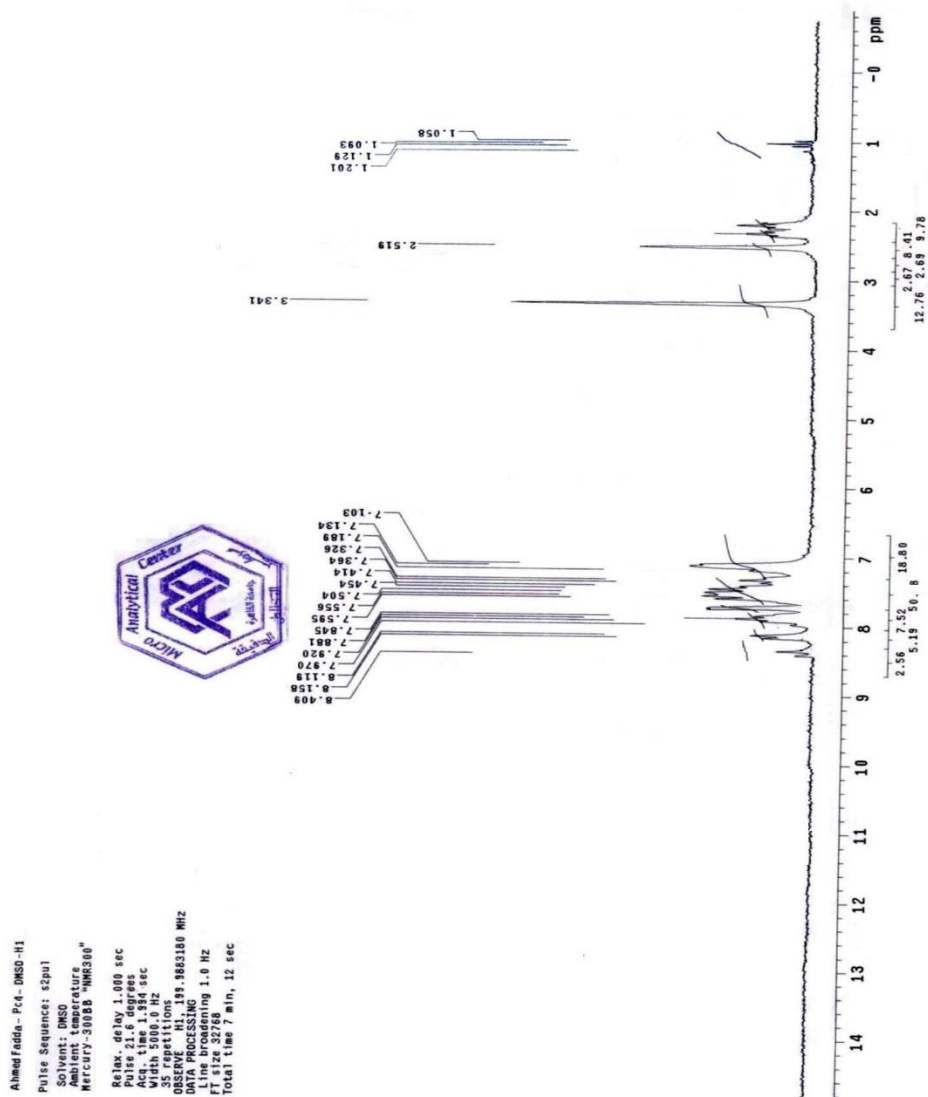

Figure 12:  $^1\text{H-NMR}$  Spectrum of Compound (12c)

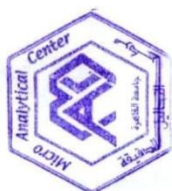

STANDARD 1H OBSERVE  
Pulse Sequence: s2pu1  
Solvent: CDCl3  
Ambient temperature  
GEMINI-200 "NMR"  
Relax delay 1.000 sec  
Acq. time 1.995 sec  
Acq. time 1.995 sec  
Width 5999.6 Hz  
100 repetitions  
Observed 139.3743276 MHz  
DATA PROCESSING  
FT size 85536  
Total time 11 min, 27 sec

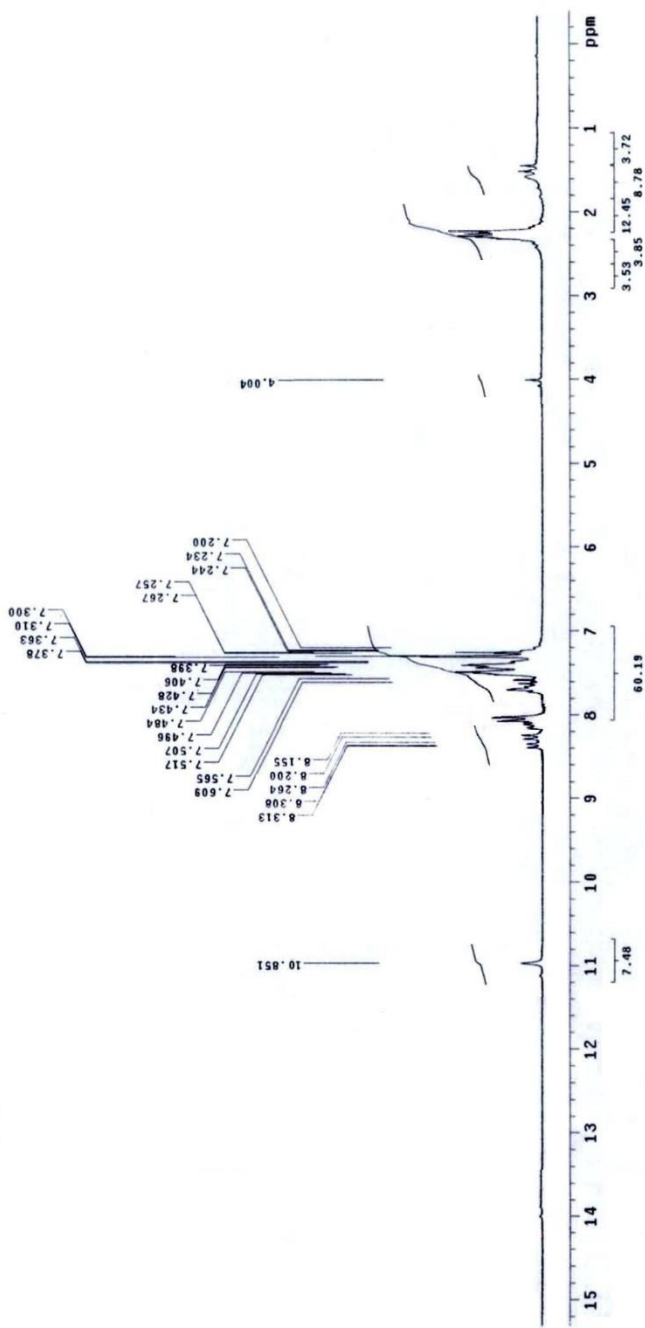

Figure 13:  $^1\text{H-NMR}$  Spectrum of Compound(14)

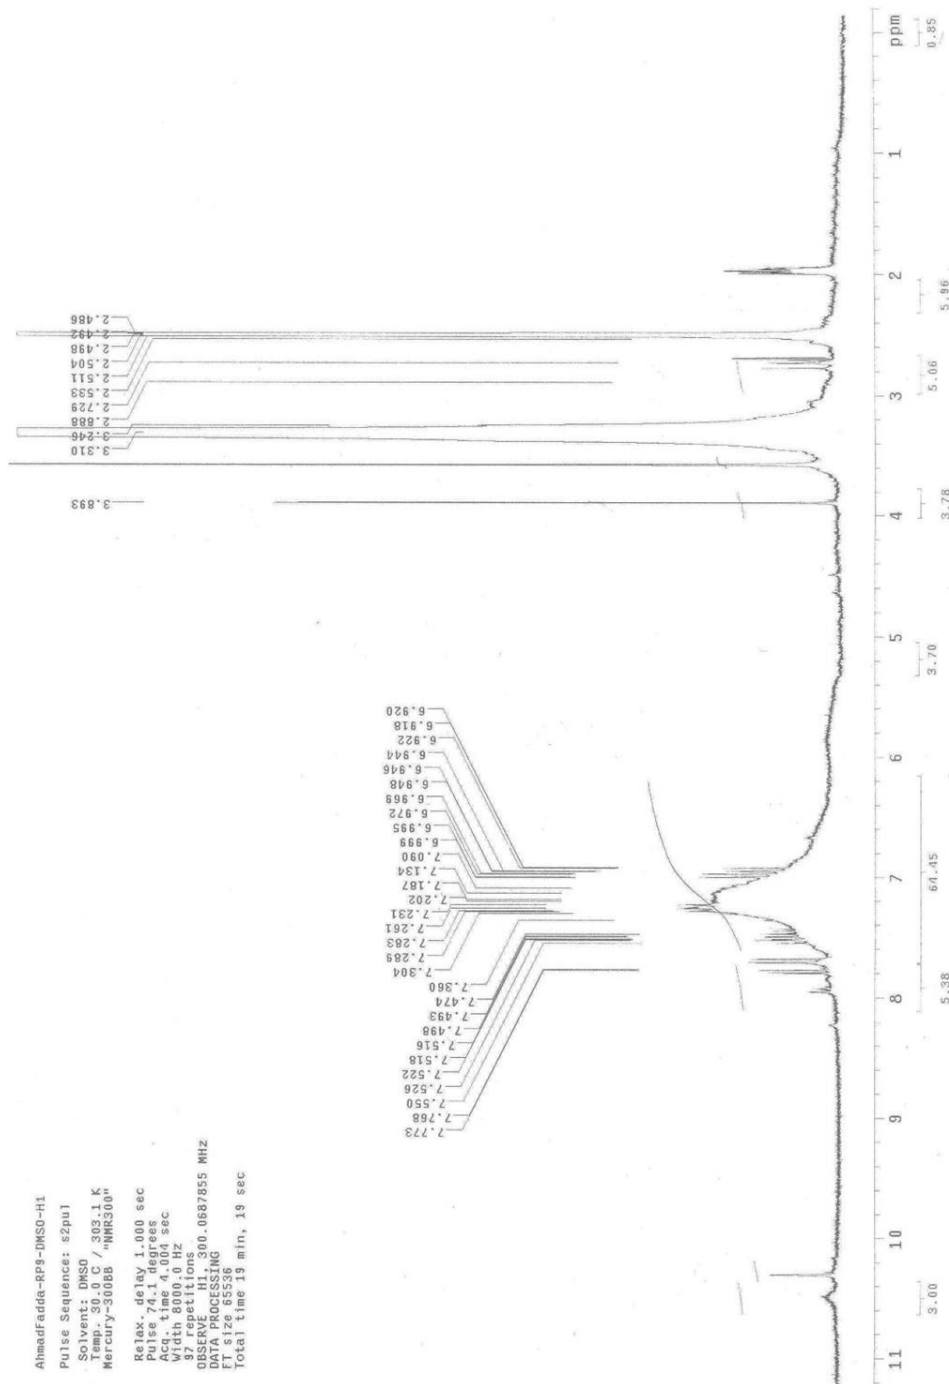

Figure 14:  $^1\text{H-NMR}$  Spectrum of Compound(15)

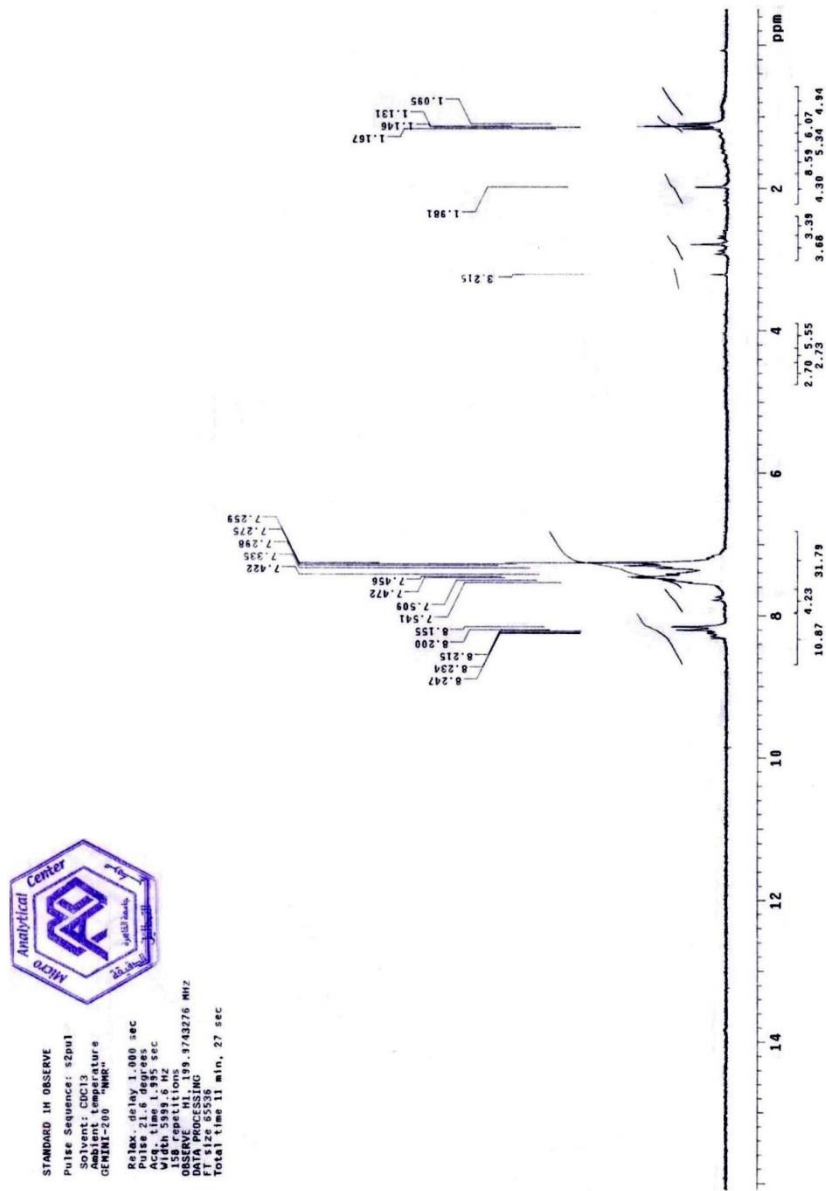

Figure 15: <sup>1</sup>H-NMR Spectrum of Compound(17)



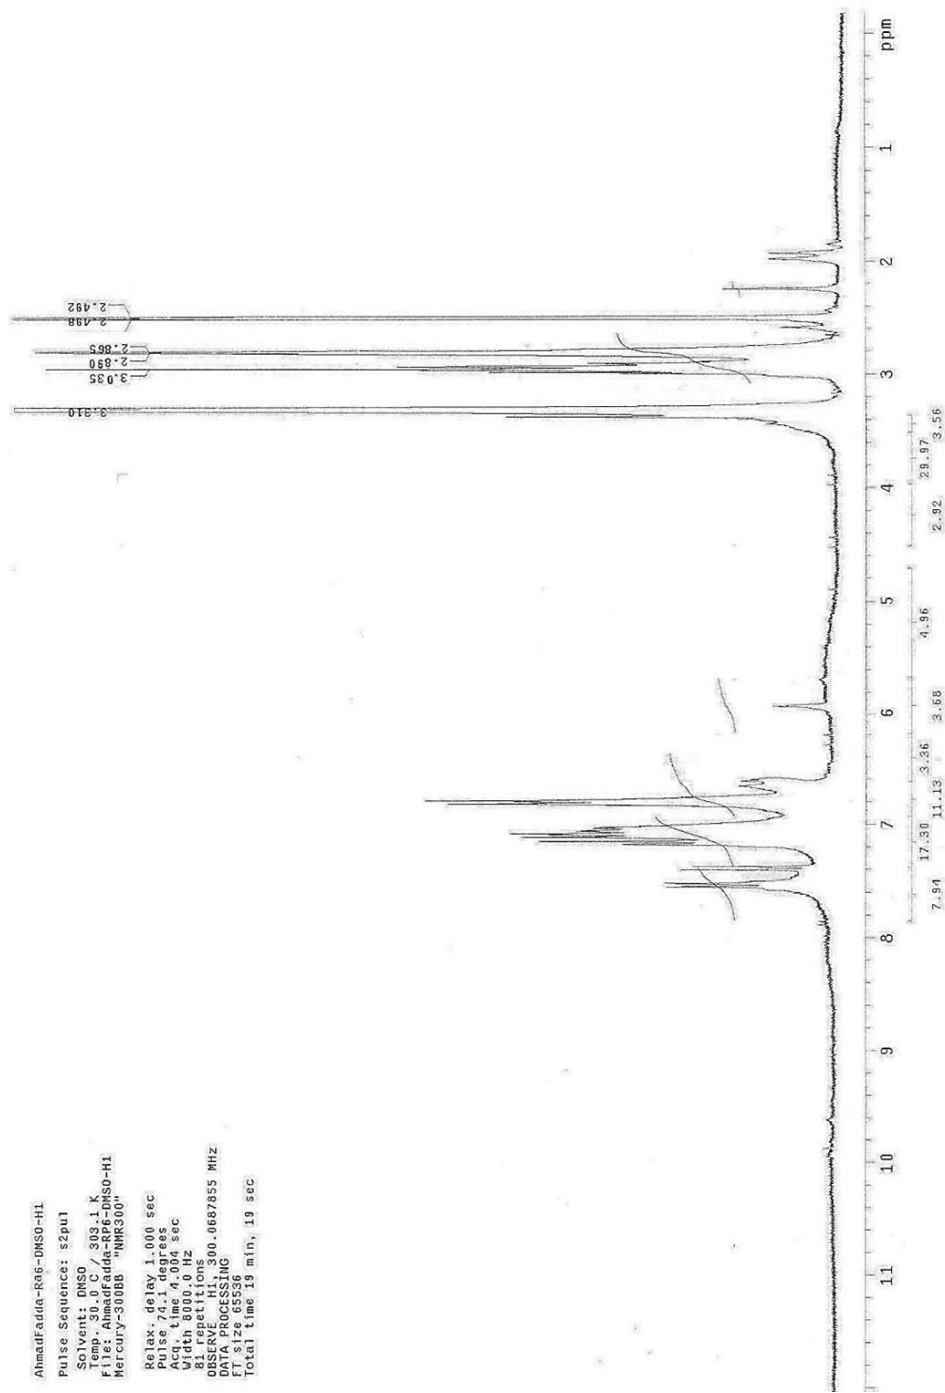

**Figure 16:**  $^1\text{H-NMR}$  Spectrum of Compound(18)

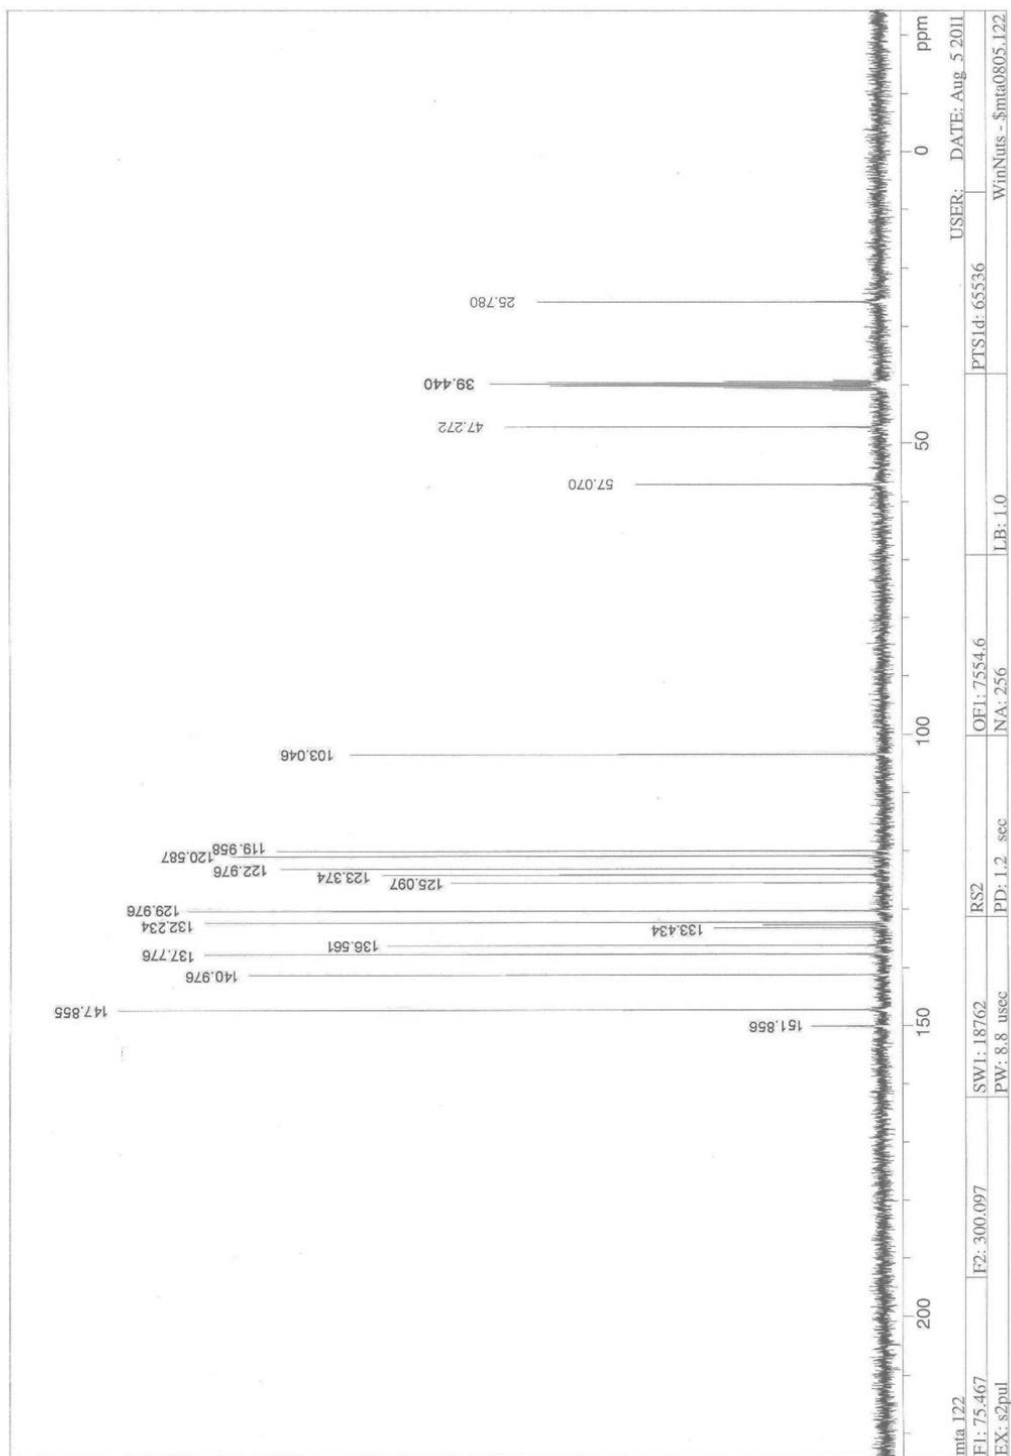

**Figure 1:**  $^{13}\text{C-NMR}$  Spectrum of Compound (1)

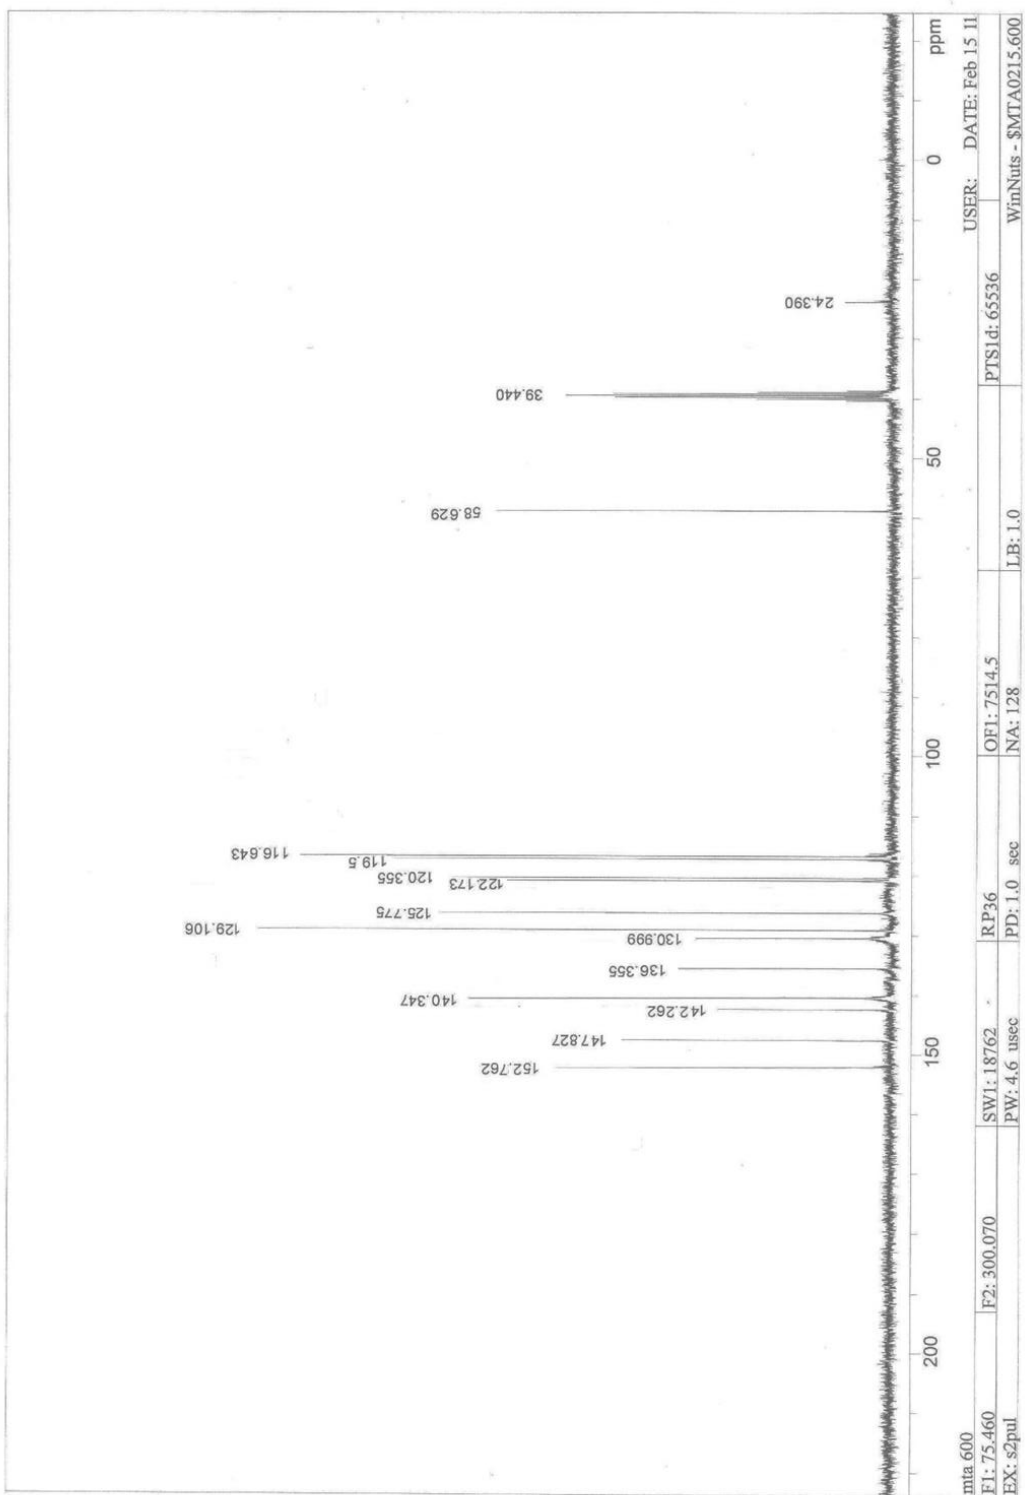

**Figure 2:**  $^{13}\text{C}$ -NMR Spectrum of Compound (3)

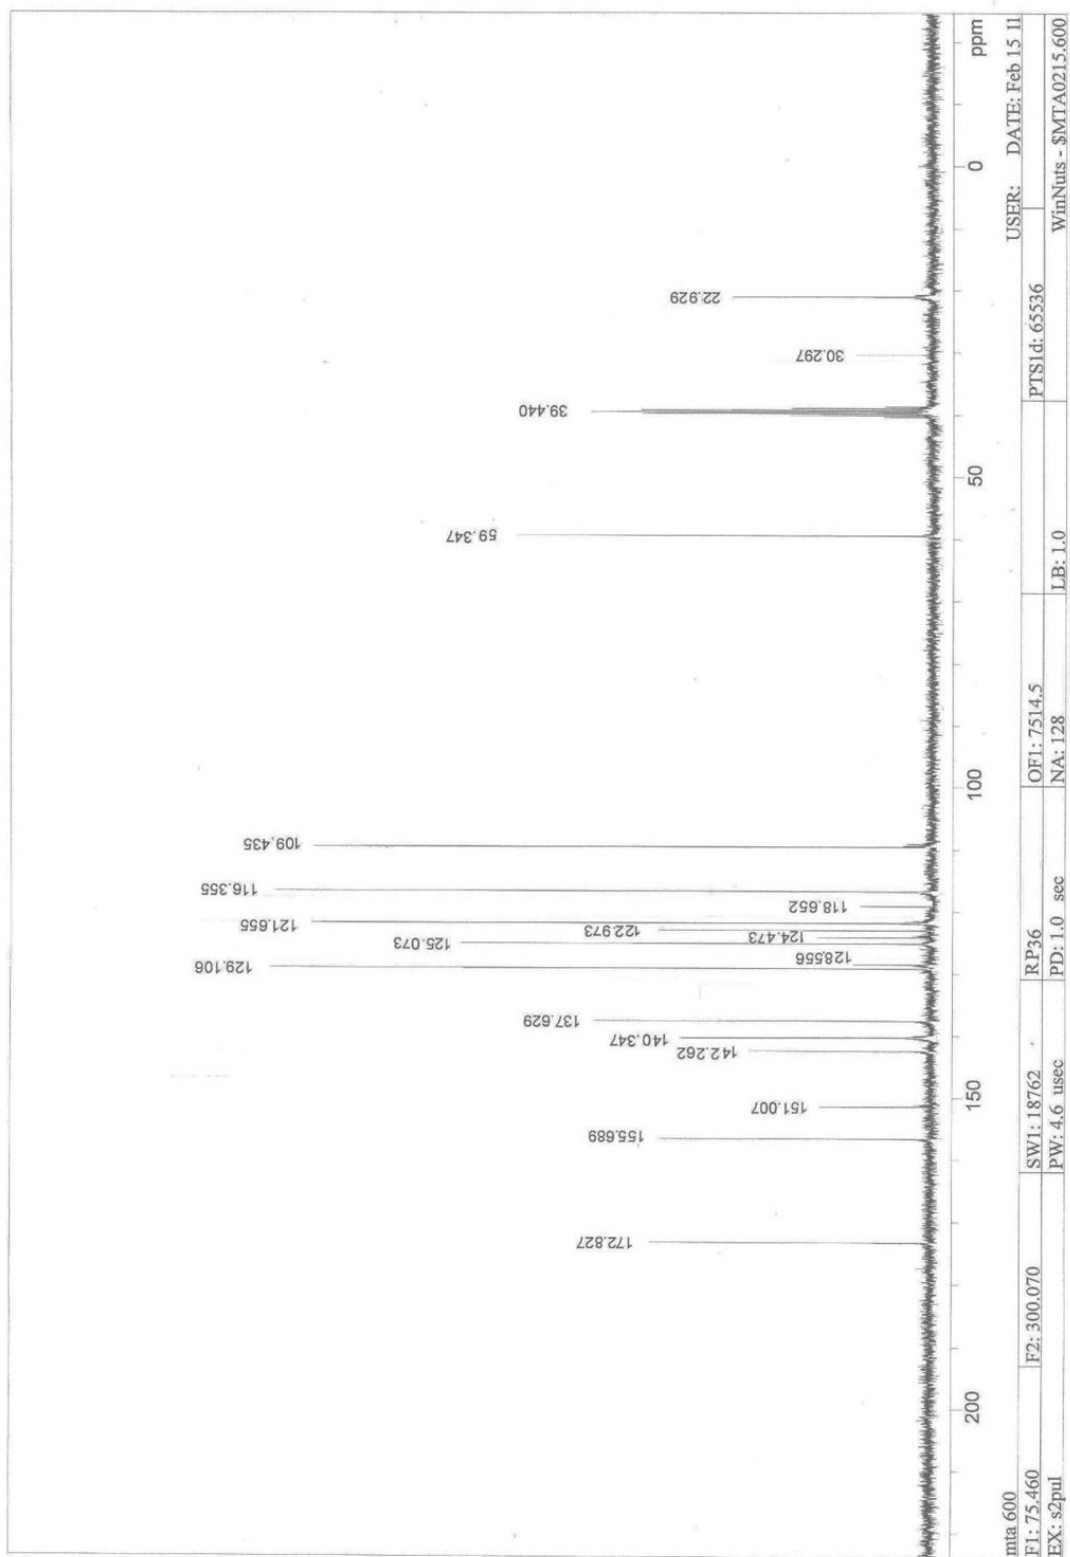

**Figure 3:**  $^{13}\text{C-NMR}$  Spectrum of Compound (7)

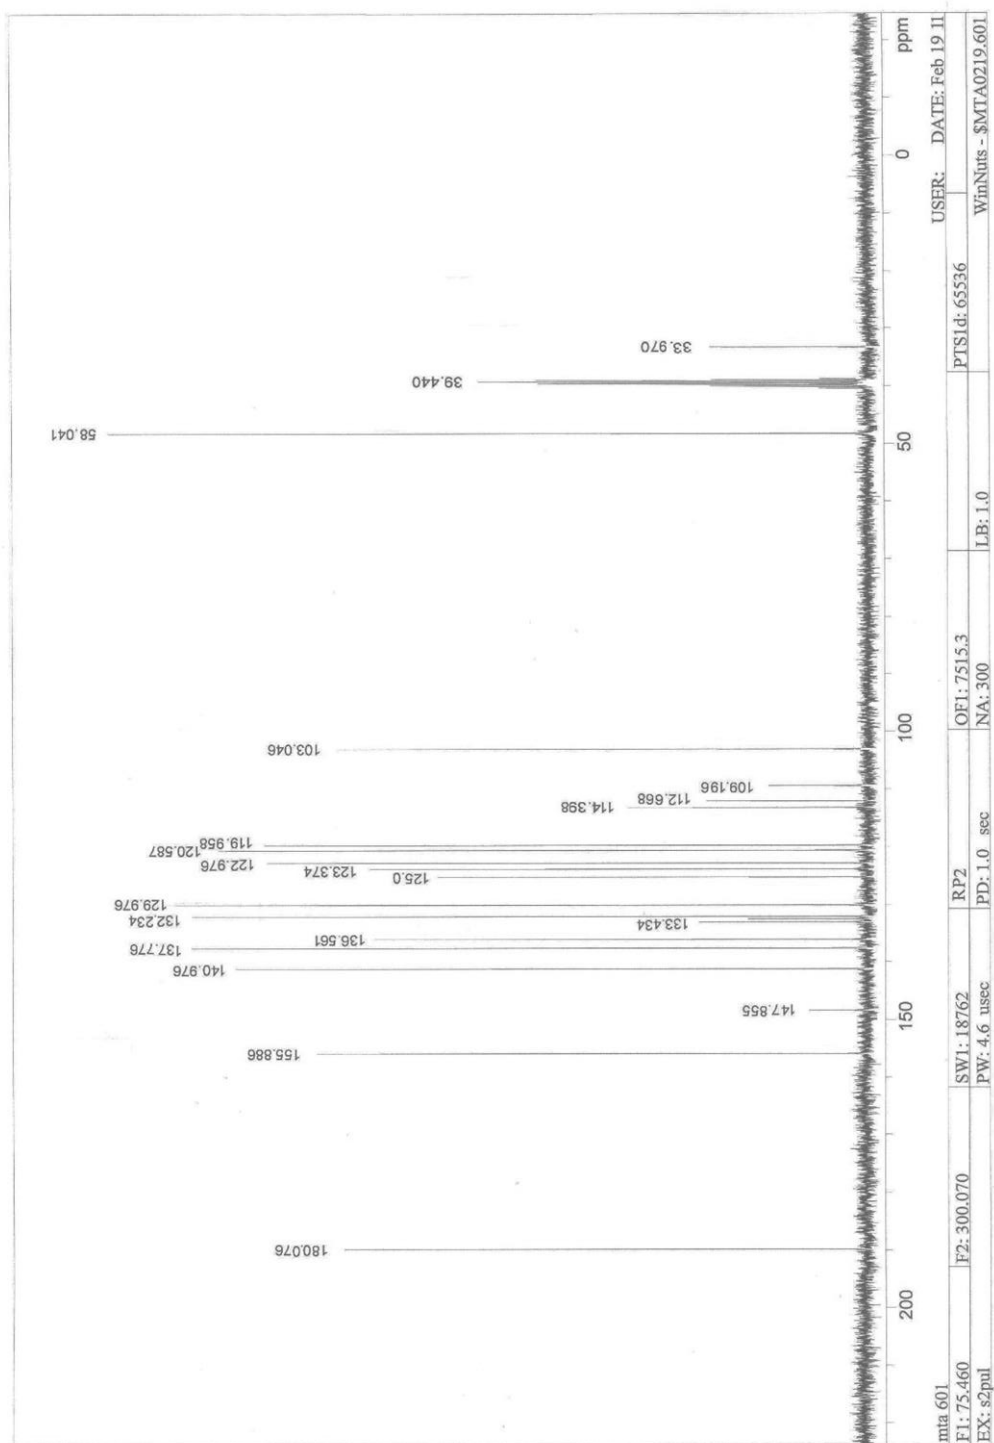

**Figure 4:**  $^{13}\text{C-NMR}$  Spectrum of Compound (8)

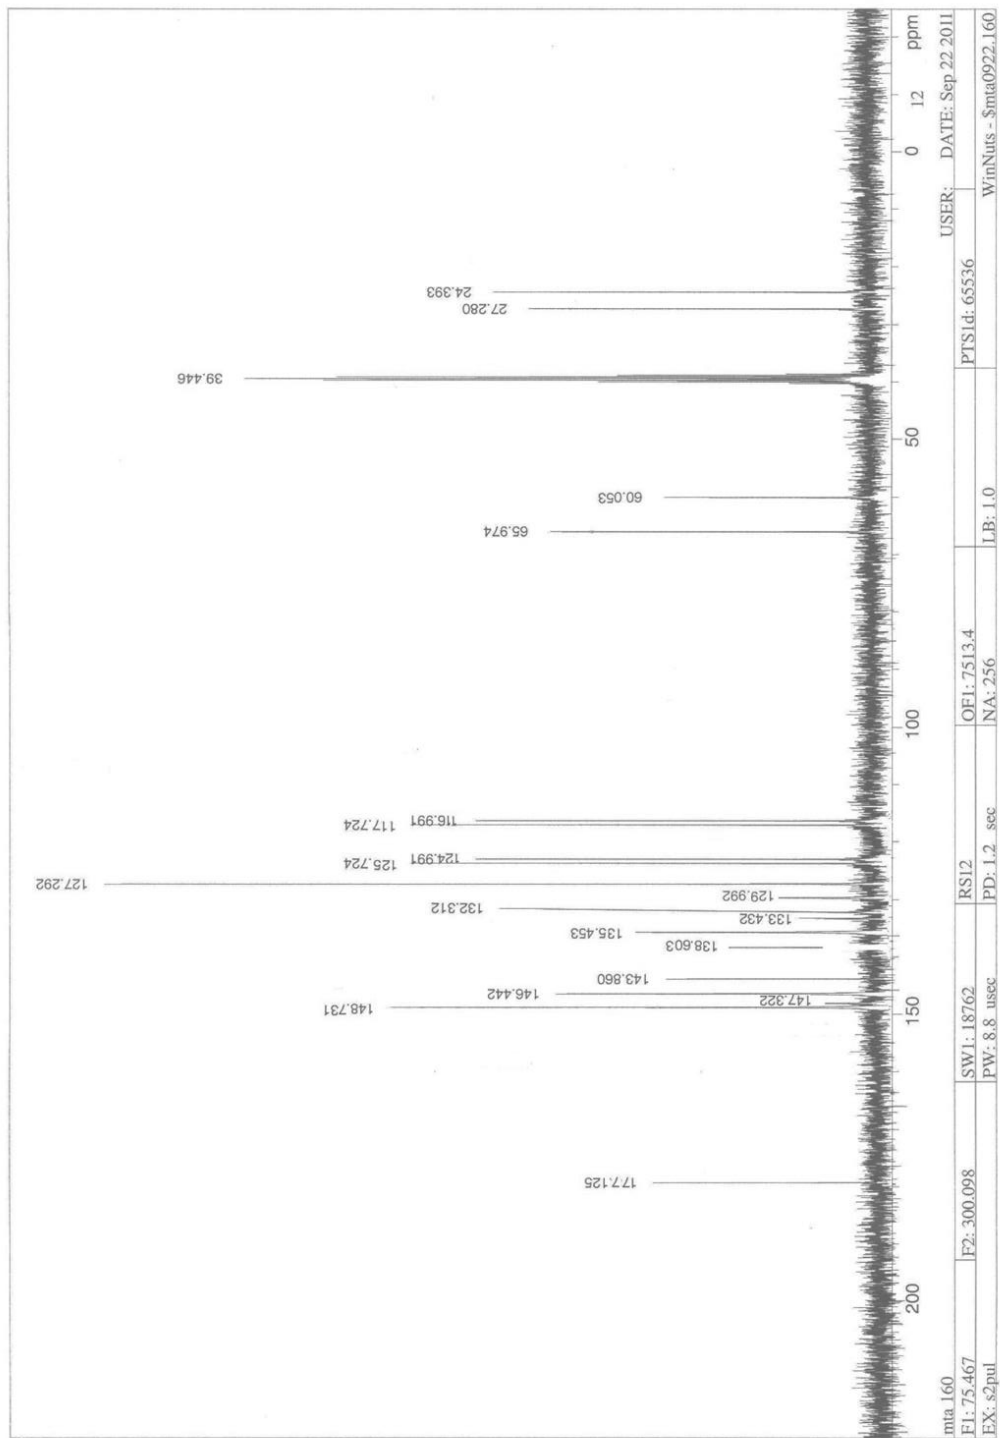

**Figure 5:**  $^{13}\text{C-NMR}$  Spectrum of Compound (9)

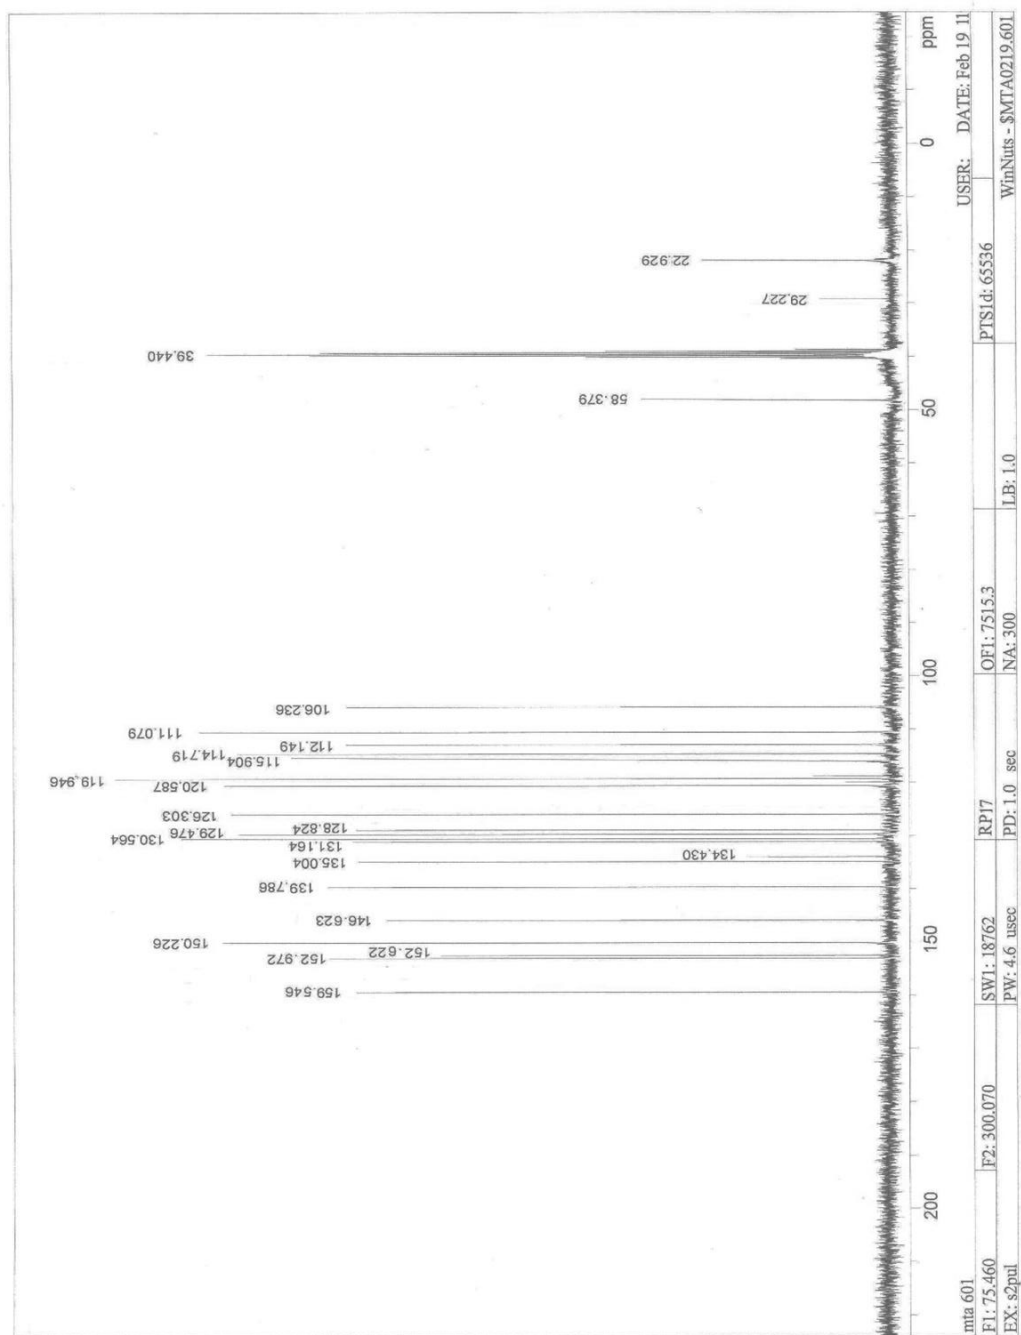

**Figure 6:**  $^{13}\text{C}$ -NMR Spectrum of Compound (10)

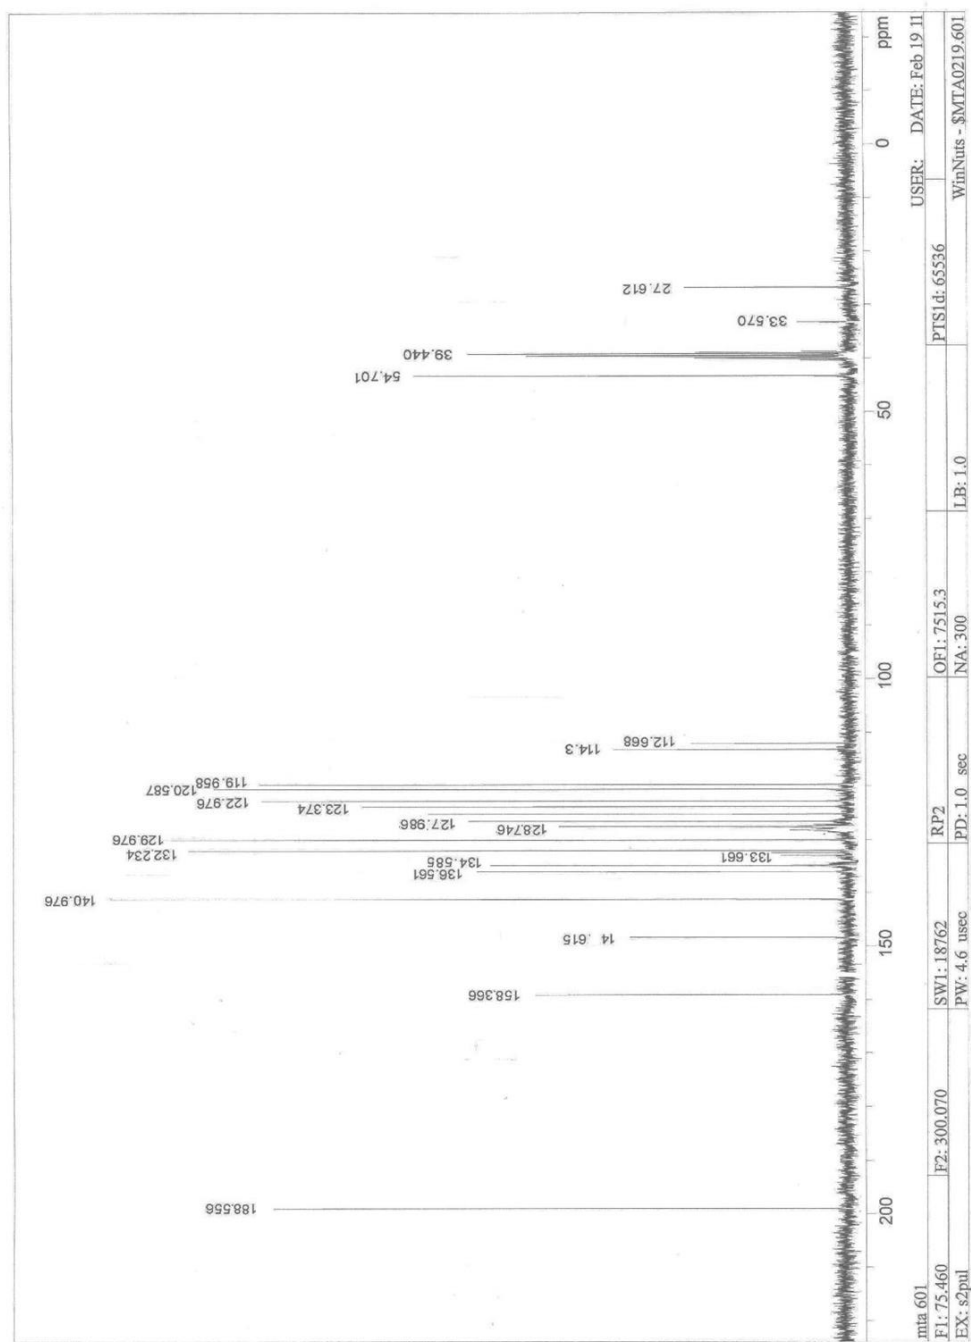

Figure 7:  $^{13}\text{C}$ -NMR Spectrum of Compound (11a)



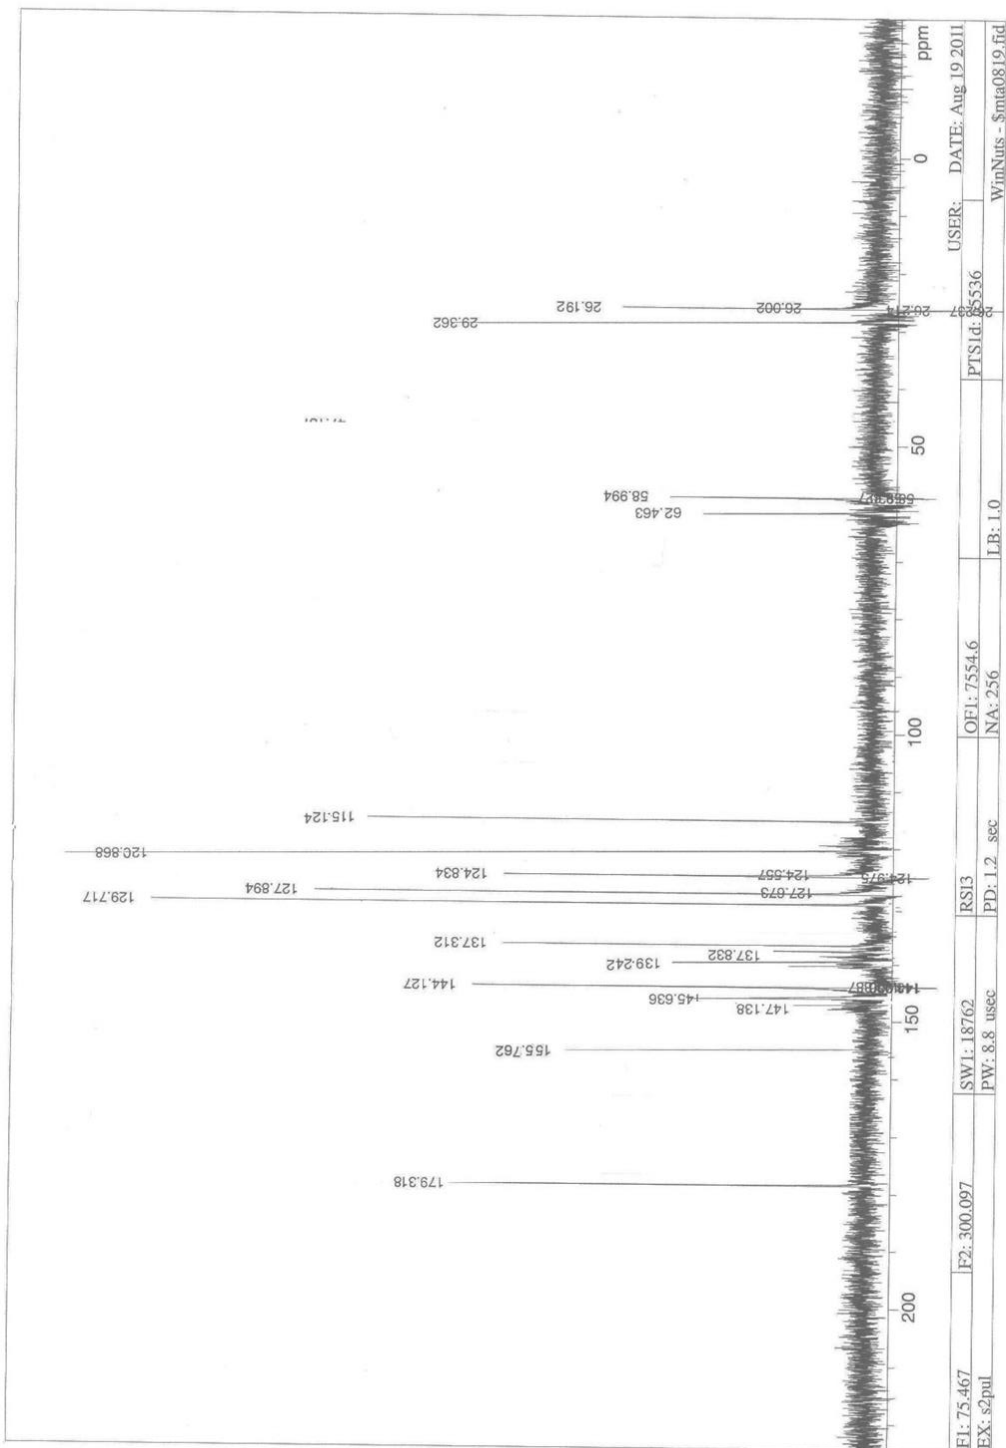

**Figure 8:**  $^{13}\text{C}$ -NMR Spectrum of Compound (12a)

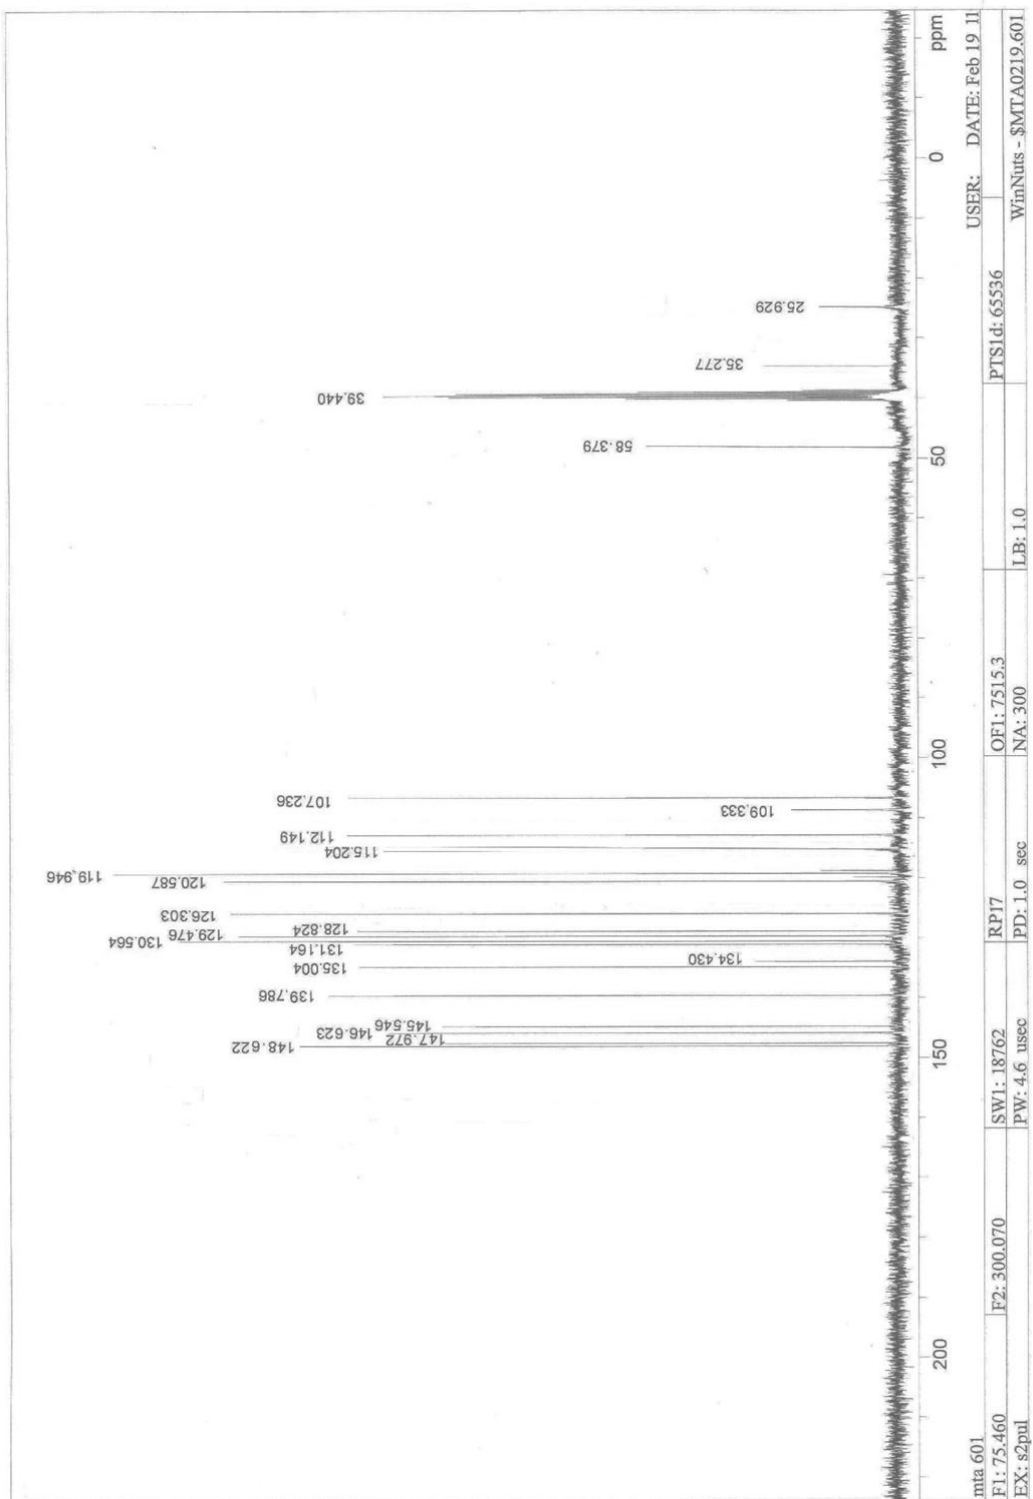

**Figure 9:**  $^{13}\text{C}$ -NMR Spectrum of Compound (14)

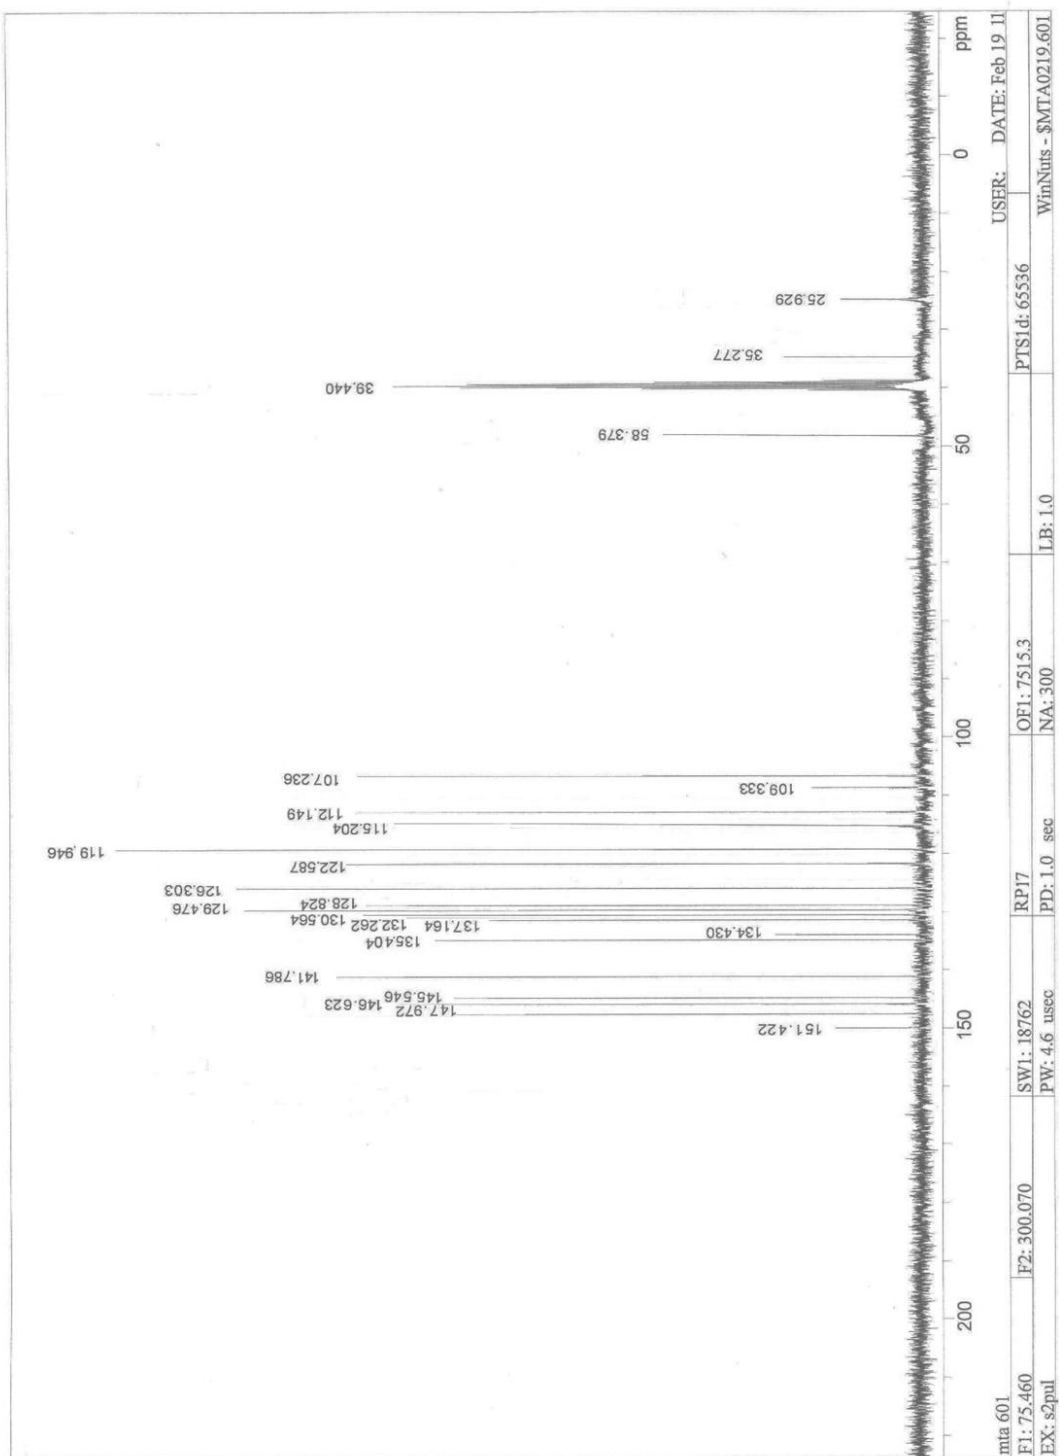

Figure 10:  $^{13}\text{C-NMR}$  Spectrum of Compound (15)

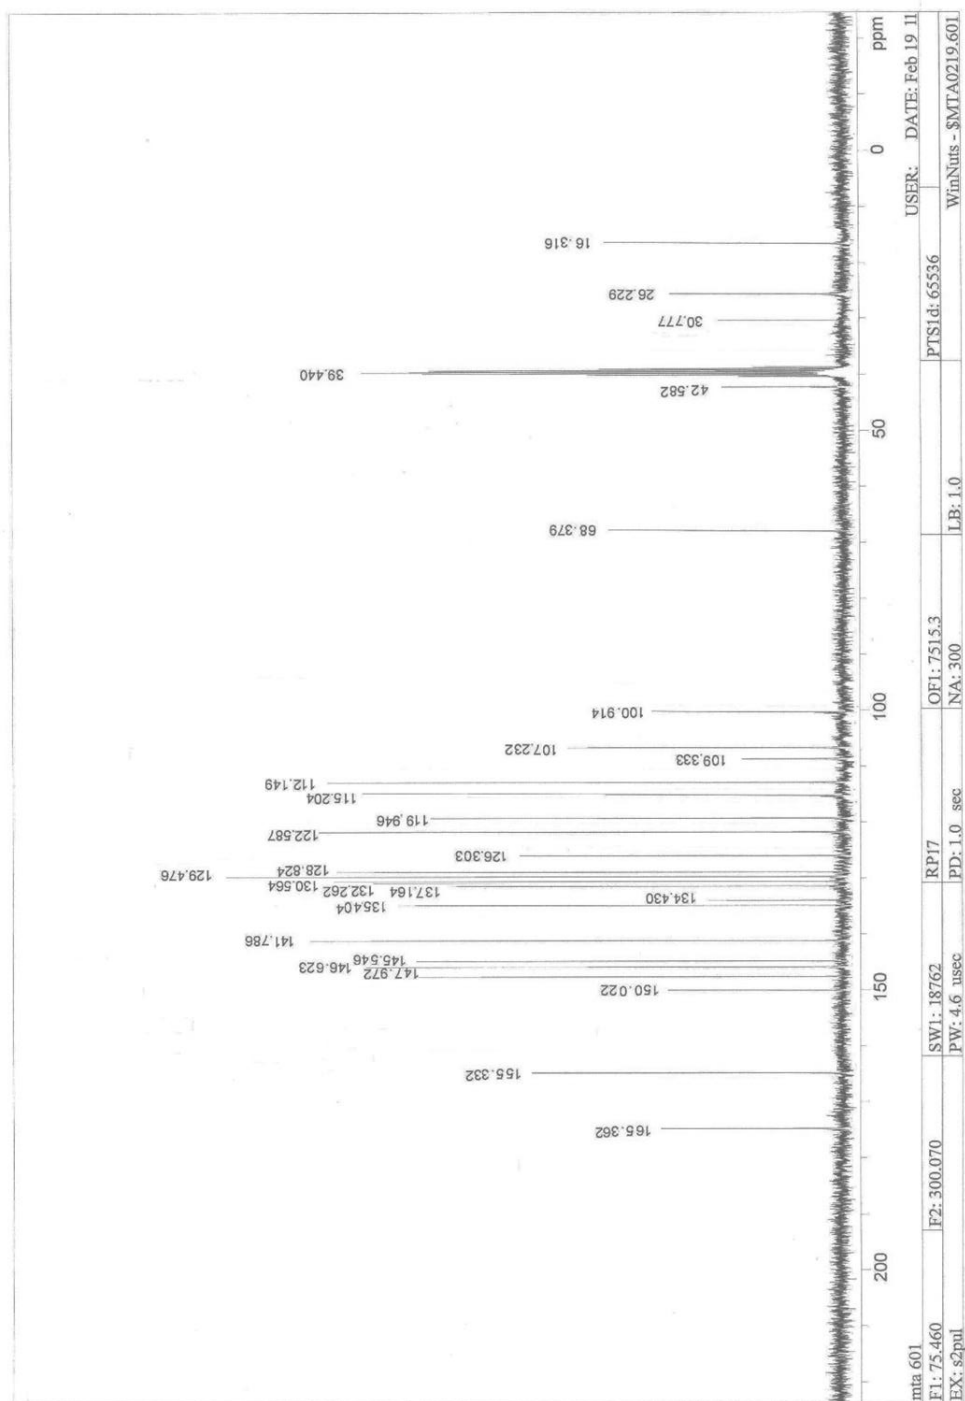

Figure 11:  $^{13}\text{C-NMR}$  Spectrum of Compound (17)

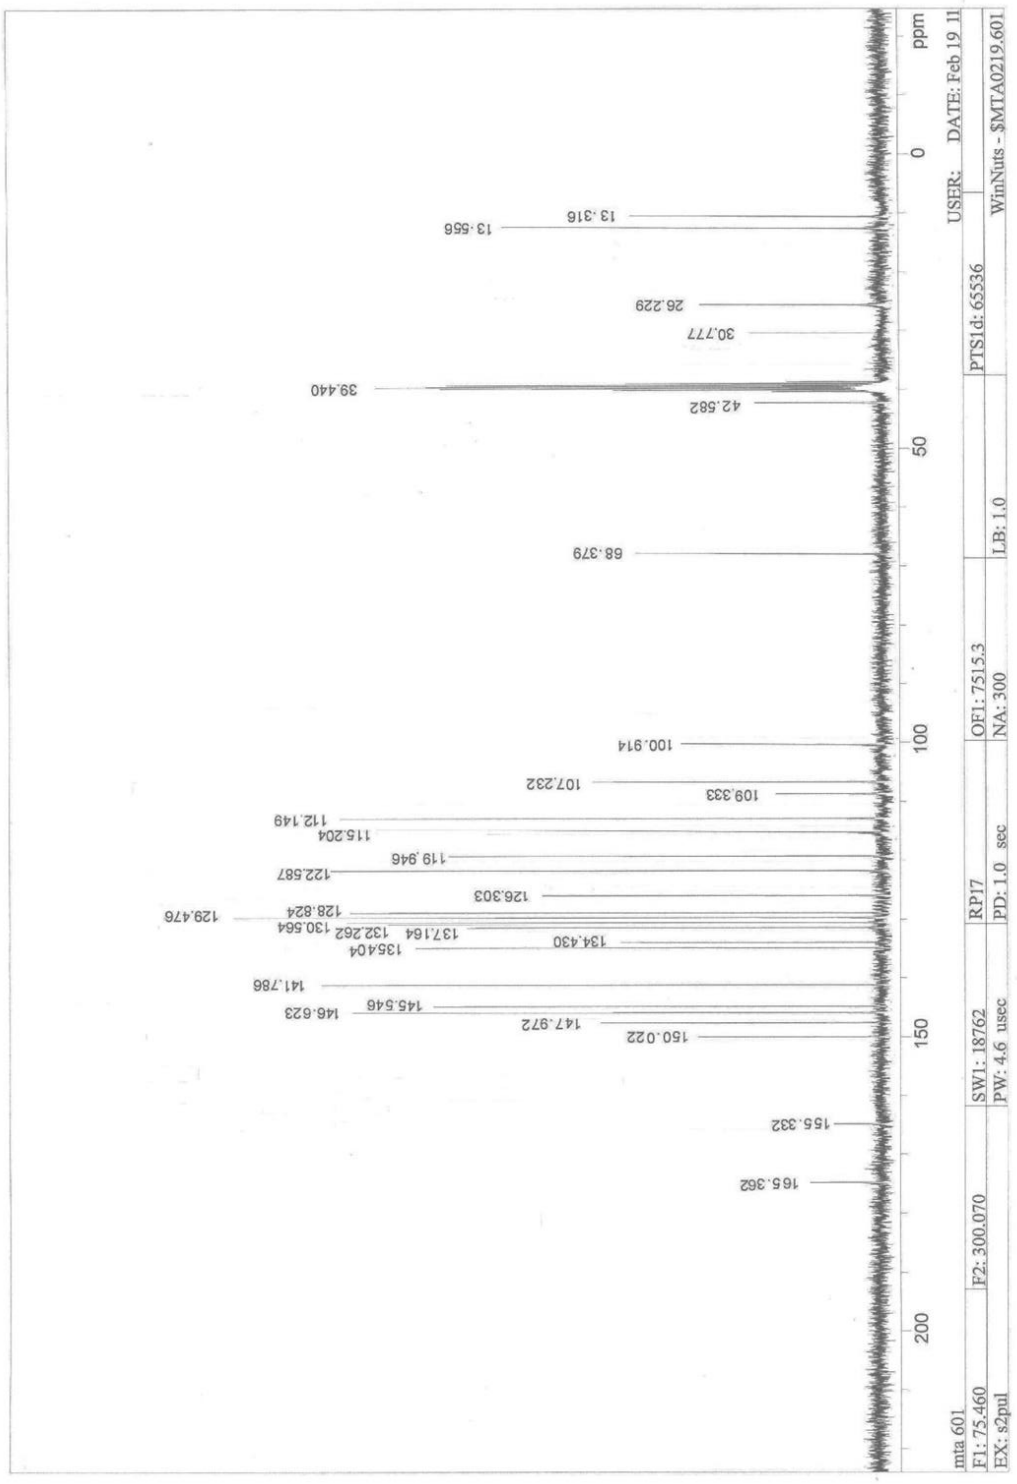

Figure 12:  $^{13}\text{C-NMR}$  Spectrum of Compound (18)
